# Supplementary material for: Time-resolved operando insights into the tunable selectivity of Cu–Zn nanocubes during pulsed CO2 electroreduction
Source: Royal Society of Chemistry journal article supplement (doi:10.1039/d4ee02308k), 2024-01-01
Supplement: d4ee02308k1.pdf [file d4ee02308k1.pdf]

# Time-Resolved Operando Insights into the Tunable Selectivity of Cu-Zn Nanocubes during Pulsed CO<sub>2</sub> Electroreduction

## Author list

*Antonia Herzog<sup>1,†</sup>, Martina Rüscher<sup>1</sup>, Hyo Sang Jeon<sup>1</sup>, Janis Timoshenko<sup>1</sup>, Clara Rettenmaier<sup>1</sup>, Uta Hejral<sup>1</sup>, Earl M. Davis<sup>1</sup>, F. T. Haase<sup>1</sup>, David Kordus<sup>1</sup>, Stefanie Kühl<sup>1</sup>, Wiebke Frandsen<sup>1</sup>, Arno Bergmann<sup>1\*</sup>, Beatriz Roldan Cuenya<sup>1\*</sup>*

## Affiliations

<sup>1</sup>Department of Interface Science, Fritz-Haber Institute of the Max-Planck Society, 14195 Berlin, Germany

<sup>†</sup>Present address: Massachusetts Institute of Technology, Research Laboratory of Electronics, 77 Massachusetts Ave, Cambridge, MA 02139, USA

## Corresponding authors

\*[abergmann@fhi-berlin.mpg.de](mailto:abergmann@fhi-berlin.mpg.de), [roldan@fhi-berlin.mpg.de](mailto:roldan@fhi-berlin.mpg.de)

## Supplementary Notes

### Supplementary Note 1. Calculation of the Faradaic efficiencies for gas and liquid products.

The Faradaic efficiencies (FEs) of the gas products were calculated as:

$$FE_x = \frac{\dot{V} C_x z_x F}{V_M j_{total} \frac{t_c}{t_c + t_a}} \cdot 100\%$$

and the FEs for liquid products was calculated as:

$$FE_x = \frac{V \Delta C_x z_x F}{\Delta Q} \cdot 100\%$$

$FE_x$ : Faradaic efficiency of product  $x$

$\dot{V}$ : Flow rate of  $CO_2$  /  $L s^{-1}$

$C_x$ : Volume-fraction of the product  $x$  detected by GC

$z_x$ : Electrons transferred for reduction to product  $x$

$F$ : Faradaic constant /  $96485 C mol^{-1}$

$V_M$ : Molar volume /  $24.5 L mol^{-1}$

$j_{total}$ : Total current density during  $CO_2$  electrolysis in the cathodic part /  $A cm^{-2}$

$t_c$ : Duration of the cathodic pulse / s

$t_a$ : Duration of the anodic pulse / s

$\Delta C_x$ : Accumulated concentration of product  $x$  detected by HPLC or liquid GC /  $mol L^{-1}$

$\Delta Q$ : Total charge transfer during the electrolysis at constant potential or current / C

$V$ : Volume of the electrolyte / L.

For the gas products,  $\dot{V}$  can be obtained by a universal flow meter (ADM 1000, Agilent Technologies) at the exit of the H-type cell, and  $C_x$  is given based on a previous calibration of the GC.  $A$  equals  $2 cm^2$  here. We used a simplified approach to calculate the FEs for gaseous products during pulsed  $CO_2RR$ , where we assumed that the  $CO_2RR$ -related currents equal the currents achieved upon equilibration. **Fig. S17** demonstrates that the time required for the current to equilibrate during a cathodic pulse is much smaller than the total pulse duration. Consequently, the current transferred due to additional electrochemical processes, which were not specifically accounted for, such as reductive or capacitive processes, is relatively small compared to the  $CO_2RR$ -related current. For the liquid products,  $\Delta Q$  can be obtained by the integration of the cathodic current and subtraction of the charging current. More details about the calculations of all products can be found in our previous work.<sup>1</sup>

## Supplementary Note 2. Validation of the machine learning approach

To extract the weights of the Cu and Zn species, conventional linear combination analysis (LCA) for the Cu K-edge was used, while for the Zn K-edge, the LCA fitting faced some limitations. First of all, as demonstrated in our previous study,<sup>2</sup> the Cu-Zn samples contain a Zn-oxide phase with a much higher degree of disorder and thus vary in structure from the wurtzite-type ZnO that was used as a reference. Further, alloy formation under reaction conditions can lead to a heterogenous mix of different Cu-Zn alloy structures (Cu-rich versus Zn-rich structures), while for our reference sample, the common Cu<sub>70</sub>Zn<sub>30</sub> brass foil was used. To overcome these limitations, we developed a machine learning (ML) approach, which is described in more detail in a previous study.<sup>2</sup> This ML approach is based on the extraction of radial distribution functions of neighboring atoms from EXAFS data. In particular, a neural network (NN) is trained by using large sets of theoretically relevant structure models (oxide, fcc, and non-fcc phases) obtained from molecular dynamics (MD) and Monte Carlo (MC) simulations using empirical force field models. After validation of the NN with known structures (Zn, CuZn, and ZnO), we applied the NN to the EXAFS data of the operando measurements to extract the partial RDFs. The weight of different phases was obtained by integrating specific peaks of the partial RDFs divided by the true number of neighbors for the corresponding phase (oxide, fcc, or non-fcc). Compared to the LCA fitting, the NN-EXAFS analysis showed that a much higher contribution of an oxide phase remained in the sample even at -1.0 V. To verify those results, a conventional FEFFIT was applied to the data after 1 h of reduction, and a coordination number of  $0.37 \pm 0.26$  was received (**Fig. S8**). This equals an oxide contribution of around  $9 \pm 6\%$ , which agrees with the results from the ML approach (ca. 12%). Additionally, the LCA analysis (LCA2) was performed by using the spectrum collected under OCP as a reference instead of the wurtzite-type ZnO, which also resulted in higher amounts of this initial oxide structure (ca. 6%) after 1 hour of reduction (**Fig. S5**). The trained NN could not be applied to the Zn K-edge XANES data set used for the cyclic voltammogram measurements in this study (**Fig. 4**) due to a glitch in the EXAFS spectra at 9878 eV (k-value: 7.5) of the QXAFS data collected at the ROCK beamline of the SOLEIL synchrotron. However, when performing the LCA fit on the QXAFS data from the initial reduction prior to the CV scan, the results for the weights of the species (Zn foil, CuZn foil, and wurtzite-type ZnO) are much closer to those of the NN-EXAFS analysis performed for the data collected at the SuperXAS-X10DA beamline. Moreover, as already observed before, the general redox behavior of our sample remained the same and followed the same trends. Therefore, for the CV data set, only the conventional LCA was used for both edges (Cu and Zn K-edge) to follow the changes of species during the CV scans.

## Supplementary Figures

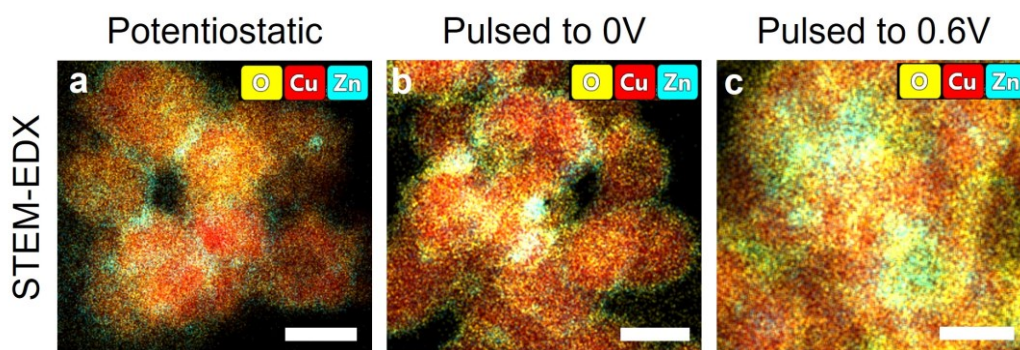

**Figure S1.** STEM-EDX images of the Cu-Zn catalyst after different electrochemical treatments in CO<sub>2</sub>-saturated 0.1 M KHCO<sub>3</sub>. **a**, shows the catalyst after 1 h of potentiostatic CO<sub>2</sub>RR at -1.0 V<sub>RHE</sub>, **b**, after 1 h of pulsed CO<sub>2</sub>RR with  $E_a = 0$  V and **c**, after 1 h of pulsed CO<sub>2</sub>RR with  $E_a = 0.6$  V, where  $E_c = -1.0$  V,  $t_c = 4$  s and  $t_a = 1$  s were fixed. The given scale bars correspond to 20 nm.

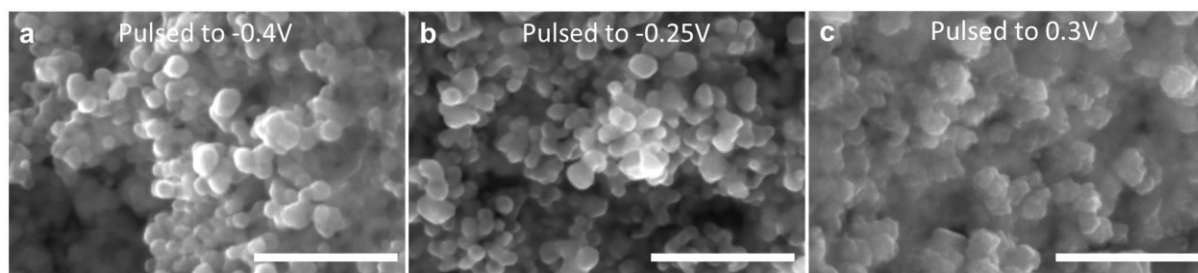

**Figure S2.** SEM images of Cu-Zn particles after different pulse protocols on carbon paper in CO<sub>2</sub>-saturated 0.1 M KHCO<sub>3</sub>.  $E_c = -1.0$  V with  $t_c = 4$  s and  $t_a = 1$  s were fixed during pulsed CO<sub>2</sub>RR for 1 h, while the anodic potential was varied in **a**, to  $E_a = -0.4$  V, in **b**, to  $E_a = -0.25$  V and in **c**, to  $E_a = 0.3$  V. The scale bar corresponds to 300 nm.

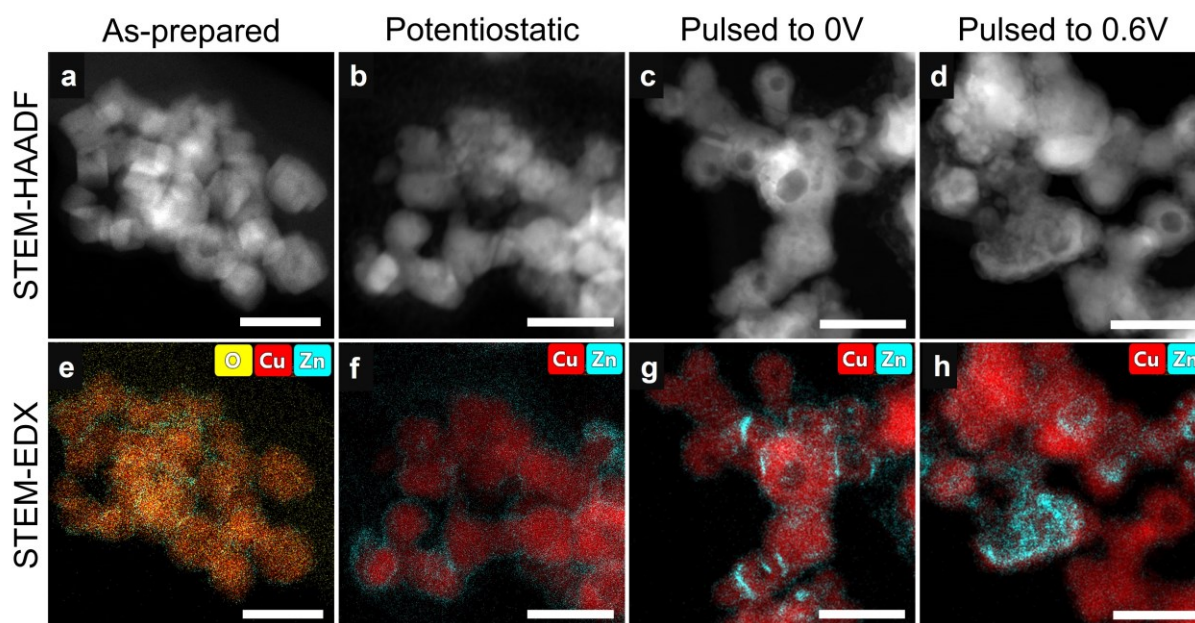

**Figure S3.** Additional STEM-HAADF and STEM-EDX images of the Cu-Zn catalyst after different conditions in the upper and lower panel, respectively. **a,e**, show the as-prepared state, **b,f**, after 1 h of potentiostatic CO<sub>2</sub>RR at -1.0 V, **c,g**, after 1 h of pulsed CO<sub>2</sub>RR with  $E_a = 0$  V and **d,h**, after 1 h of pulsed CO<sub>2</sub>RR with  $E_a = 0.6$  V (fixed  $E_c = -1.0$  V,  $t_c = 4$  s and  $t_a = 1$  s) in CO<sub>2</sub>-saturated 0.1 M KHCO<sub>3</sub>. The given scale bars correspond to 50 nm.

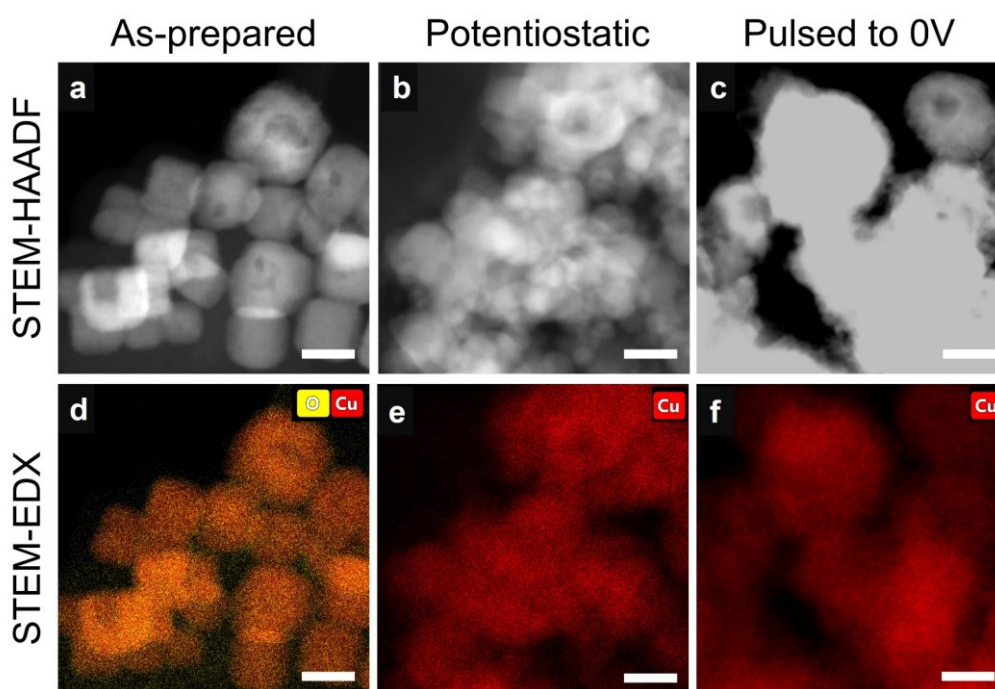

**Figure S4.** STEM-HAADF and STEM-EDX images of the bare Cu<sub>2</sub>O cubes after different conditions in upper and lower panel, respectively. **a,d**, show the as-prepared state, **b,e**, after 1 h of potentiostatic CO<sub>2</sub>RR at -1.0 V and **c,f**, after 1 h of pulsed CO<sub>2</sub>RR with  $E_a = 0$  V (fixed  $E_c = -1.0$  V,  $t_c = 4$  s and  $t_a = 1$  s) in CO<sub>2</sub>-saturated 0.1 M KHCO<sub>3</sub>. The given scale bars correspond to 20 nm.

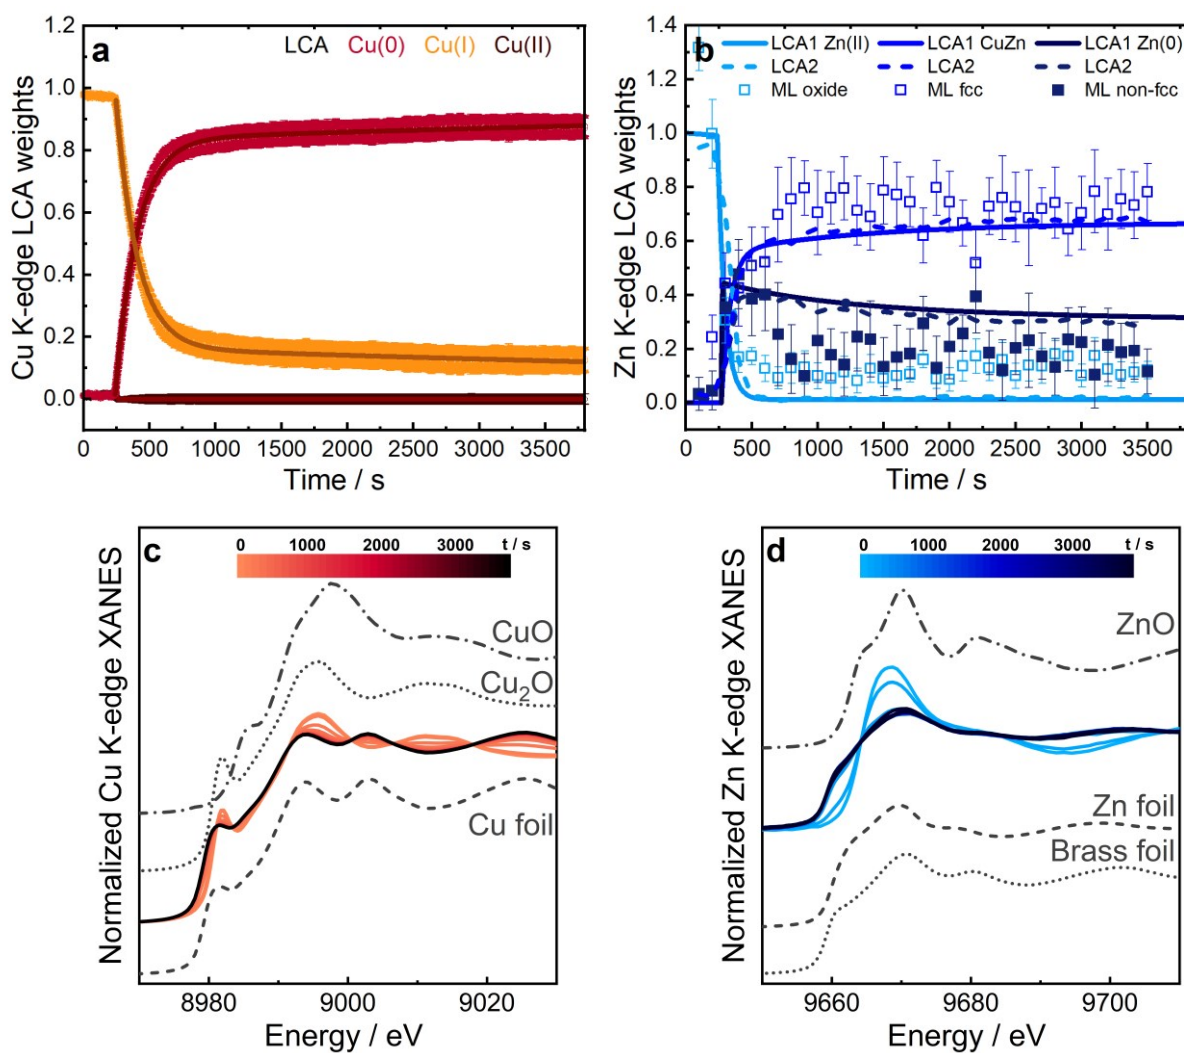

**Figure S5.** Evolution of XAS data of the Cu-Zn catalyst of Cu and Zn K-edges during the initial static CO<sub>2</sub>RR for 1 h at -1.0 V in CO<sub>2</sub>-saturated 0.1 M KHCO<sub>3</sub>. **a**, Concentration of Cu(0), Cu(I) and Cu(II) species obtained by LCA of Cu K-edge and **b**, averaged concentration of Zn(0), Zn(II) and CuZn species obtained by LCA (LCA1 with standard references and LCA2 with oxide references from as-prepared state spectra) and concentrations of oxide, fcc-like and non-fcc-like phases obtained from ML-EXAFS analysis of Zn K-edge. **c,d**, show the averaged and normalized XANES spectra (100 spectra are averaged) of the Cu and Zn K-edge, respectively, with the corresponding references for both edges.

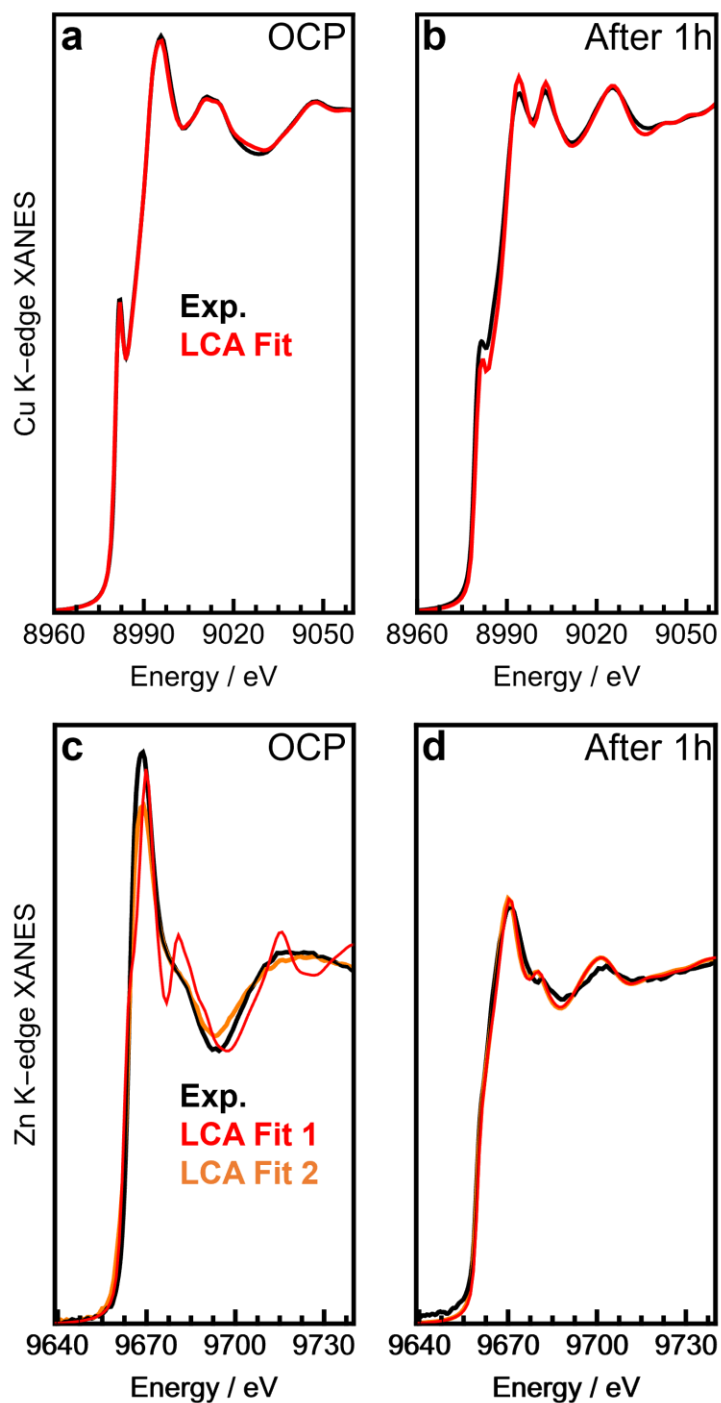

**Figure S6.** Exemplary LCA fits of the experimental XANES spectra. **a,b**, Cu K-edge under OCP and after 1 h of initial static CO<sub>2</sub>RR at -1.0 V in CO<sub>2</sub>-saturated 0.1 M KHCO<sub>3</sub>, respectively. **c,d**, Zn K-edge under OCP and after 1 h of initial static CO<sub>2</sub>RR at -1.0 V fitted with LCA1 (with standard references) and LCA2 (oxide reference equals as-prepared state spectra), respectively.

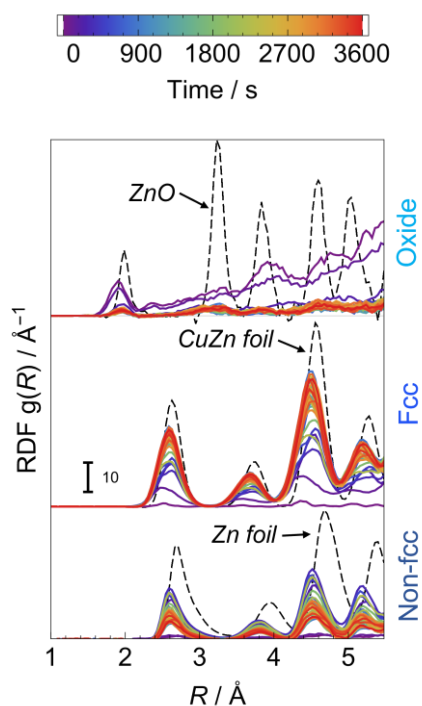

**Figure S7.** Time-dependent evolution of the radial distribution functions (RDFs)  $g(R)$  obtained by the NN-EXAFS analysis from operando Zn K-edge EXAFS data during initial static  $\text{CO}_2\text{RR}$  for 1 h at  $-1.0$  V in  $\text{CO}_2$ -saturated  $0.1$  M  $\text{KHCO}_3$ . The partial RDFs correspond to an Zn oxide phase, a metallic phase with fcc-type structure and a metallic phase with non-fcc type structure. For clarity the RDFs are shifted vertically.

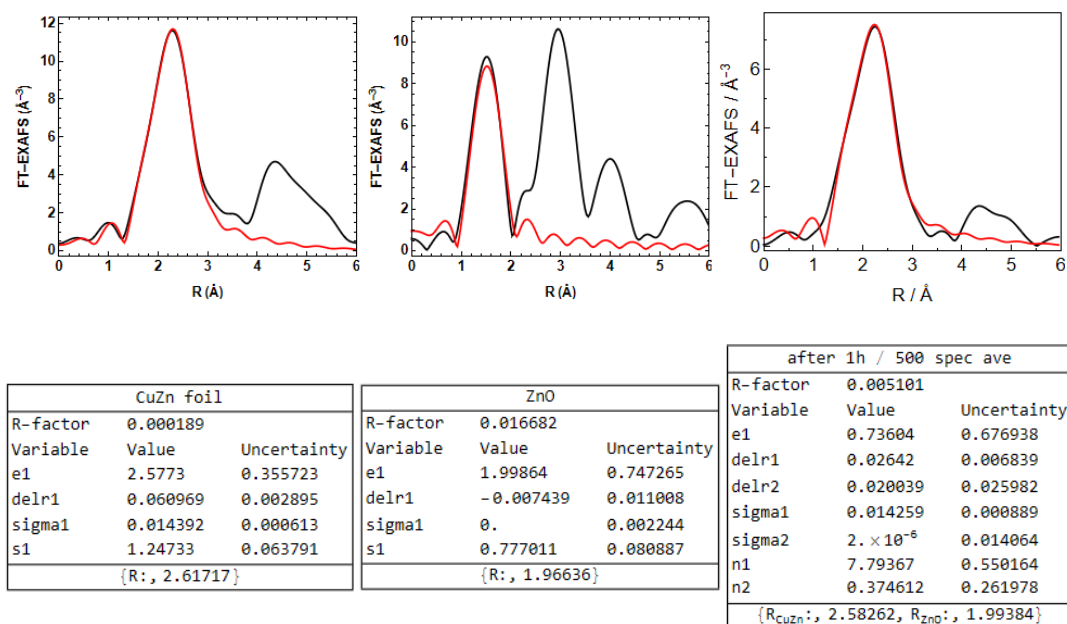

**Figure S8.** NN-EXAFS analysis results were verified by applying a conventional FEFFIT to the data after 1 h of at  $-1.0$  V in  $\text{CO}_2$ -saturated  $0.1$  M  $\text{KHCO}_3$ , where a coordination number of  $0.37(26)$  for the oxide species (equals a fraction of  $9(6)$  %) was obtained in agreement with the results from the ML approach.



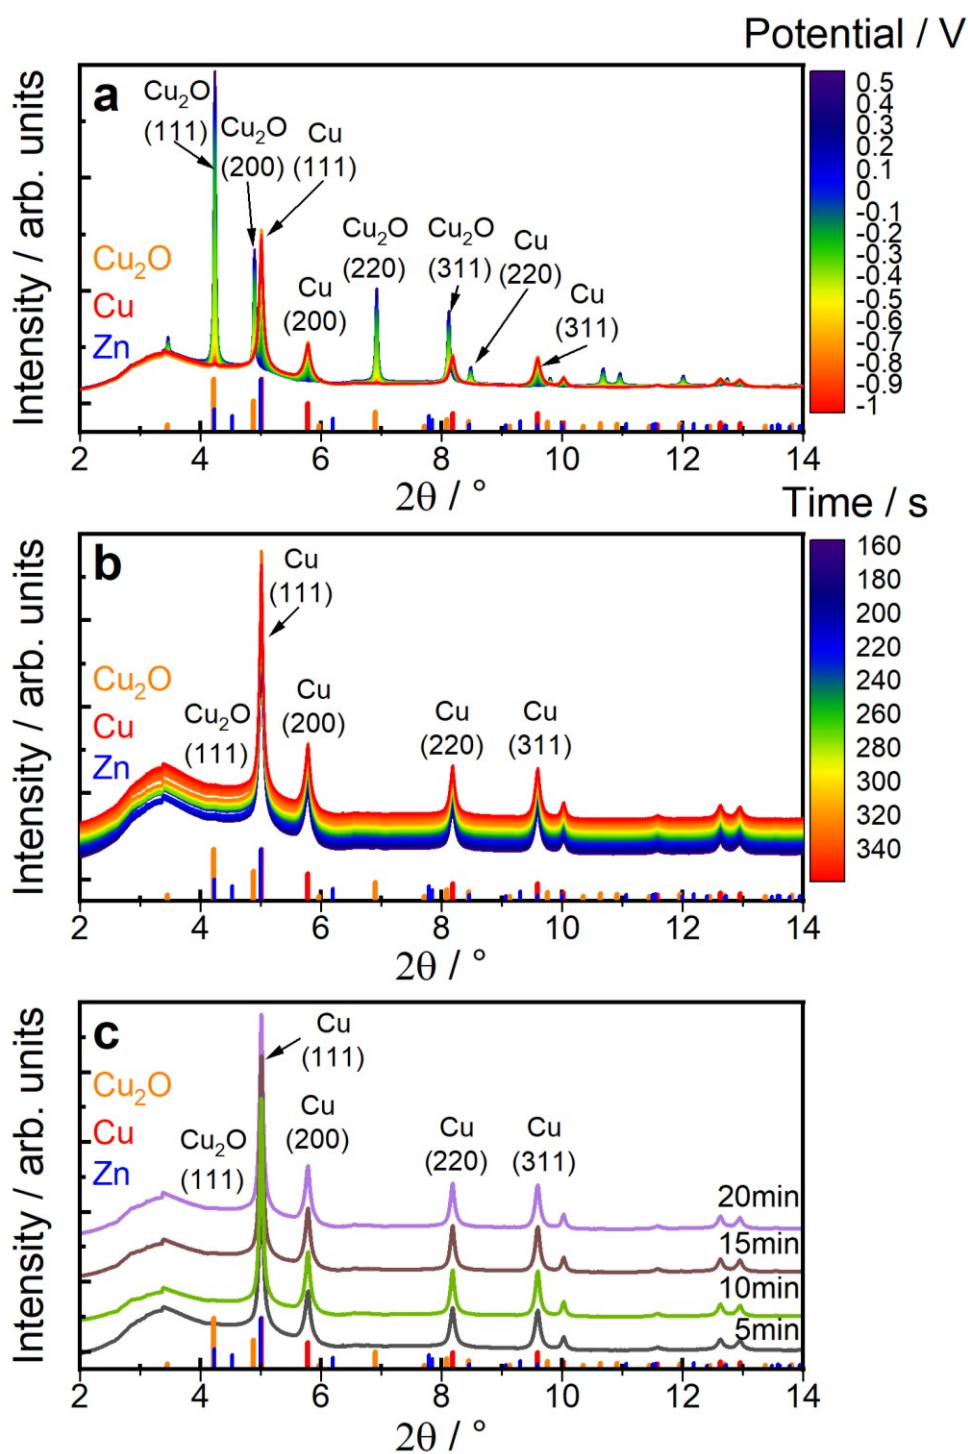

**Figure S9.** HE-XRD pattern of the Cu-Zn catalyst during static CO<sub>2</sub>RR conditions with reference peaks of Cu<sub>2</sub>O, Cu, and Zn. **a**, Averaged XRD patterns during LSV scan from OCP to -1.0 V with a scan rate of 10 mV s<sup>-1</sup> in CO<sub>2</sub>-saturated 0.1 M KHCO<sub>3</sub>. **b**, Averaged XRD patterns during the first five minutes at -1.0 V with an offset of the diffractograms for better visibility of changes. **c**, XRD pattern at 5, 10, 15, and 20 minutes at -1.0 V (with a time resolution of 5 s/diffractogram). The XRD patterns correspond to the average of 5 XRD patterns, acquired with 0.2 s/diffractogram, that can be translated into a time resolution of 1 s/diffractogram shown here.

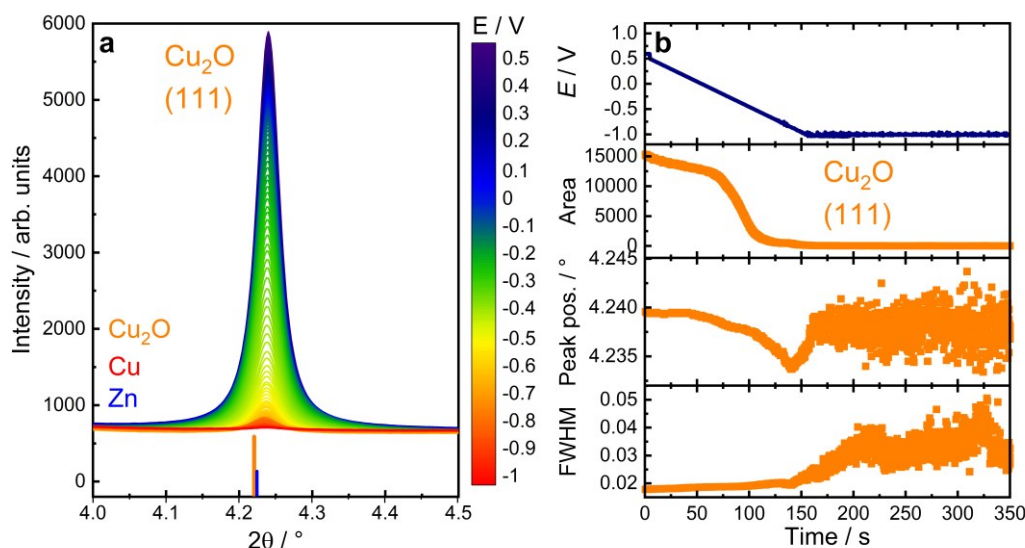

**Figure S10.** Extract of HE-XRD patterns of  $\text{Cu}_2\text{O}(111)$  and corresponding fits of Cu-Zn catalyst during LSV and static  $\text{CO}_2\text{RR}$  conditions. **a**, Extract of averaged XRD pattern during the LSV scan from OCP to  $-1.0$  V with a scan rate of  $10 \text{ mV s}^{-1}$  in  $\text{CO}_2$ -saturated  $0.1 \text{ M KHCO}_3$ . **b**, Area (second row), peak position (third row), and FWHM (fourth row) extracted from fits of  $\text{Cu}_2\text{O}(111)$  with respect to the applied potential (top row). The XRD patterns correspond to the average of 5 XRD patterns, acquired with  $0.2 \text{ s/diffractogram}$ , that can be translated into a time resolution of  $1 \text{ s/diffractogram}$  shown here.

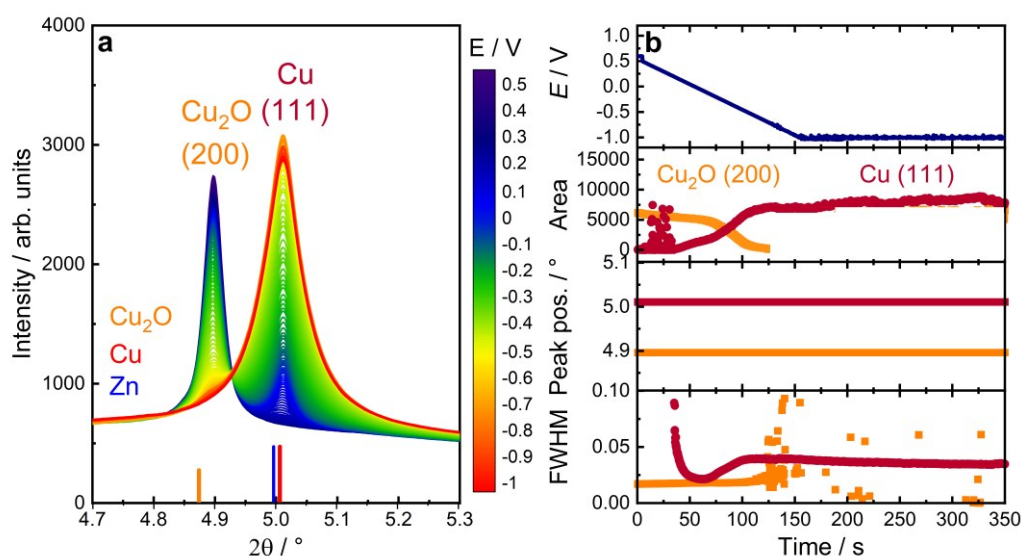

**Figure S11.** Extract of HE-XRD pattern of  $\text{Cu}_2\text{O}(200)$  and  $\text{Cu}(111)$  and corresponding fits of Cu-Zn catalyst during LSV and static  $\text{CO}_2\text{RR}$  conditions. **a**, Extract of averaged XRD pattern during the LSV scan from OCP to  $-1.0$  V with a scan rate of  $10 \text{ mV s}^{-1}$  in  $\text{CO}_2$ -saturated  $0.1 \text{ M KHCO}_3$ . **b**, Area (second row), peak position (third row), and FWHM (fourth row) extracted from fits of  $\text{Cu}_2\text{O}(200)$  and  $\text{Cu}(111)$  with respect to the applied potential (top row). The XRD patterns correspond to the average of 5 XRD patterns, acquired with  $0.2 \text{ s/diffractogram}$ , that can be translated into a time resolution of  $1 \text{ s/diffractogram}$  shown here.

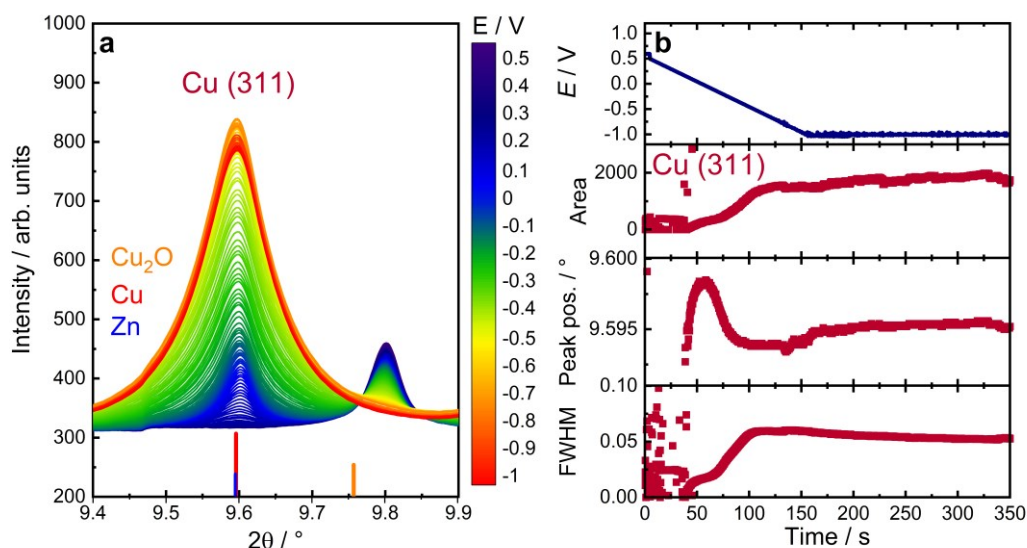

**Figure S12.** Extract of HE-XRD pattern of Cu(311) and corresponding fits of the Cu-Zn catalyst during LSV and static CO<sub>2</sub>RR conditions. **a**, Extract of averaged XRD patterns during the LSV scan from OCP to -1.0 V with a scan rate of 10 mV s<sup>-1</sup> in CO<sub>2</sub>-saturated 0.1 M KHCO<sub>3</sub>. **b**, Area (second row), peak position (third row), and FWHM (fourth row) extracted from fits of Cu(311) with respect to the applied potential (top row). The XRD patterns correspond to the average of 5 XRD patterns, acquired with 0.2 s/diffractogram, that can be translated into a time resolution of 1 s/diffractogram shown here.

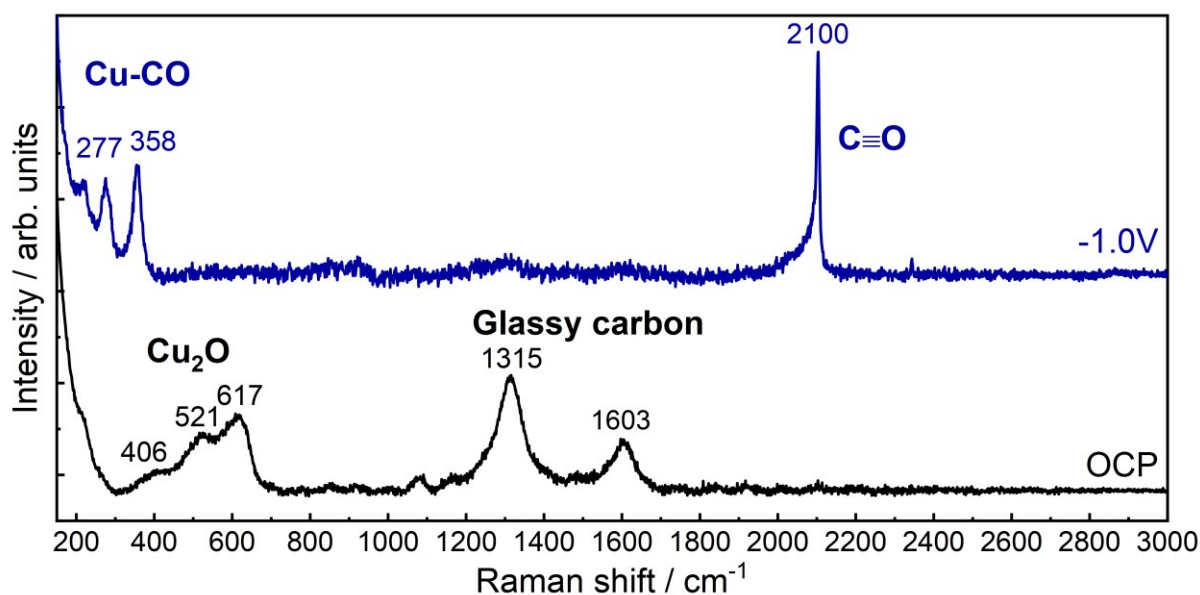

**Figure S13.** Operando SERS spectra of the Cu-Zn catalyst at OCP and during static CO<sub>2</sub>RR for 1 h at -1.0 V in CO<sub>2</sub>-saturated 0.1 M KHCO<sub>3</sub>. The peaks at 1005 and 1072 cm<sup>-1</sup> can be assigned to the vibrations of HCO<sub>3</sub><sup>-</sup> and CO<sub>3</sub><sup>2-</sup> in aqueous solution, respectively, and the peaks at 1313 and 1600 cm<sup>-1</sup> correspond to the glassy carbon support.<sup>3, 4</sup> No peaks were detected in the C-H vibration region from 2700 to 3000 cm<sup>-1</sup>. We note that the spectrum under OCP condition was recorded with a high laser power of 25 mW, while the power was decreased to 2.5 mW for the spectrum at -1.0 V to obtain appropriate signal intensities. This is a result of the strong SERS effect of the plasmonic metallic Cu nanoparticles that are formed at -1.0 V. The higher power under OCP conditions increases the laser penetration depth, which may strengthen the signals from the glassy carbon support. The HCO<sub>3</sub><sup>-</sup> and CO<sub>3</sub><sup>2-</sup> bands are small at -1.0 V due to the higher coverage of the catalyst surface with CO and other intermediates.

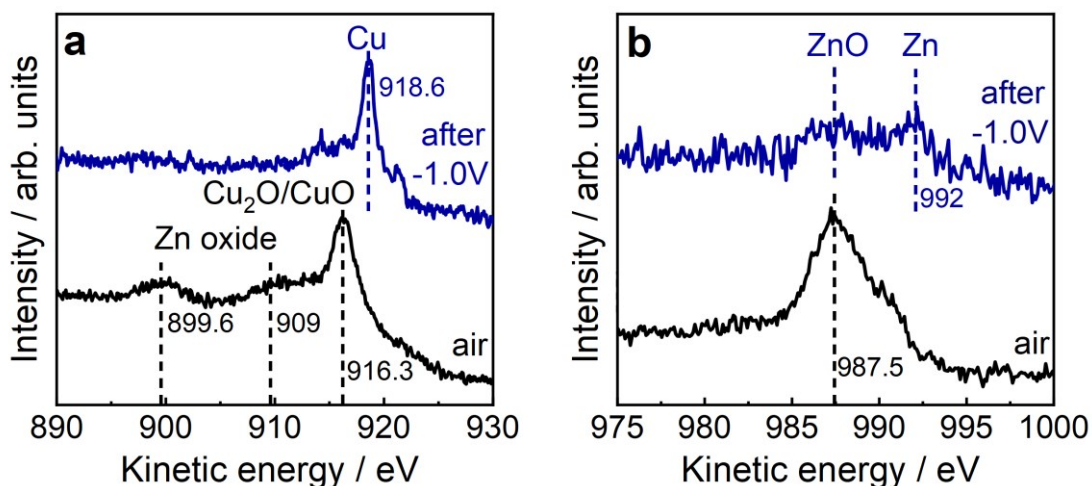

**Figure S14.** Quasi-in situ Auger spectra of the Cu-Zn catalyst in air and after 1 h of static CO<sub>2</sub>RR at -1.0 V (without air exposure) in CO<sub>2</sub>-saturated 0.1 M KHCO<sub>3</sub>. **a**, Cu LMM and **b**, Zn LMM with corresponding assignment.

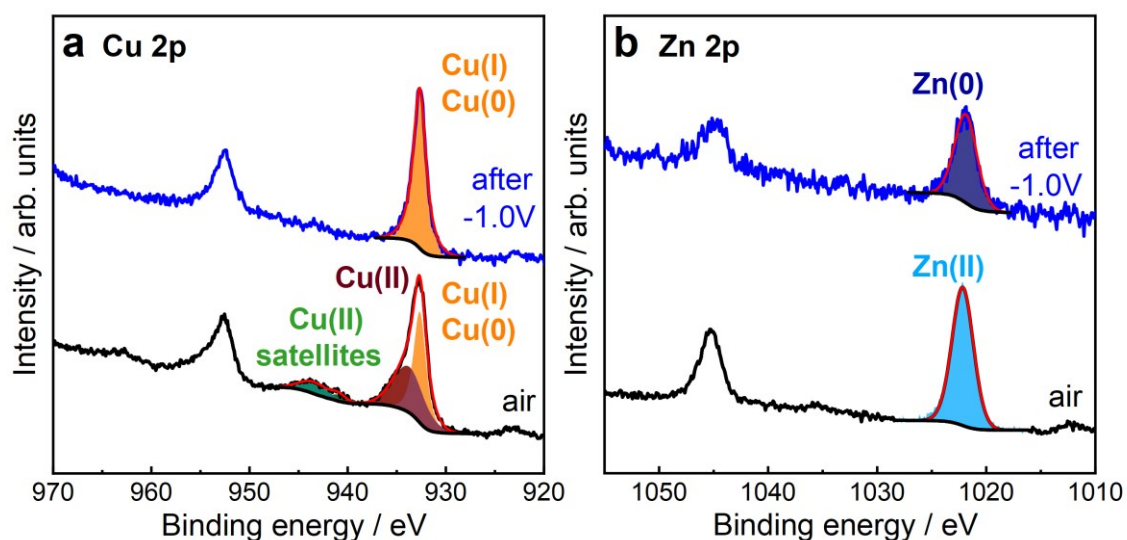

**Figure S15.** Quasi-in situ core level regions of the Cu-Zn catalyst in the as-prepared state (corresponds to the state in air) and after 1 h of static CO<sub>2</sub>RR at -1.0 V (without air exposure) in CO<sub>2</sub>-saturated 0.1 M KHCO<sub>3</sub>. **a**, Cu 2p region and **b**, Zn 2p region with corresponding fits (red line). The Cu 2p core level region of the as-prepared sample shows the presence of Cu(0)/Cu(I) and a shake-up satellite corresponding to Cu(II).

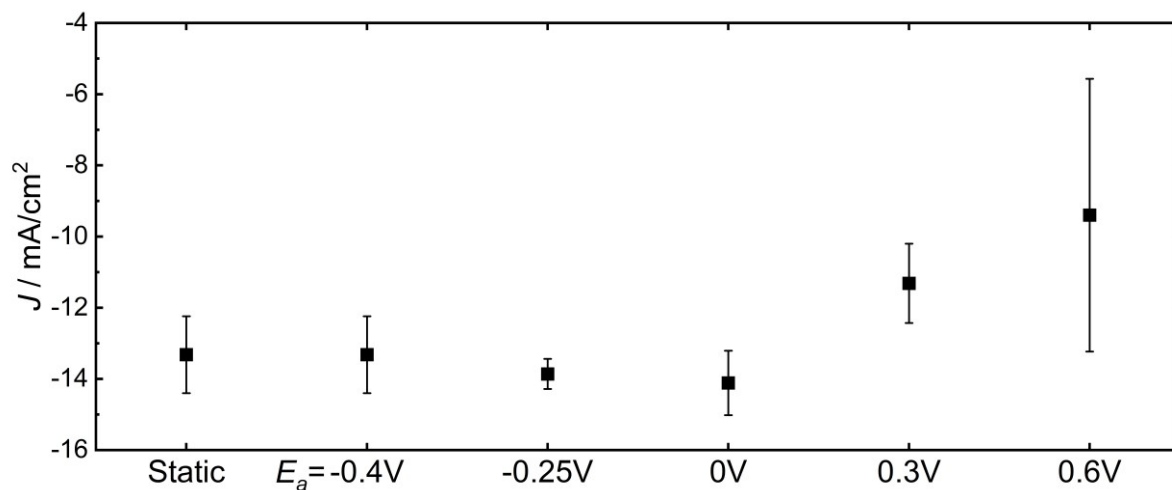

**Figure S16.** Averaged current densities,  $J$ , of the Cu-Zn catalyst under potentiostatic conditions (-1.0 V) and under pulsed electrolysis conditions with a fixed  $E_c$  value at -1.0 V and different  $E_a$  values and  $t_c = 4$  s and  $t_a = 1$  s during 1 h of the reaction in  $\text{CO}_2$ -saturated 0.1 M  $\text{KHCO}_3$ . The large error bar at  $E_a = 0.6$  V highlights the instability of the current density, which increased significantly during the reaction under these conditions.

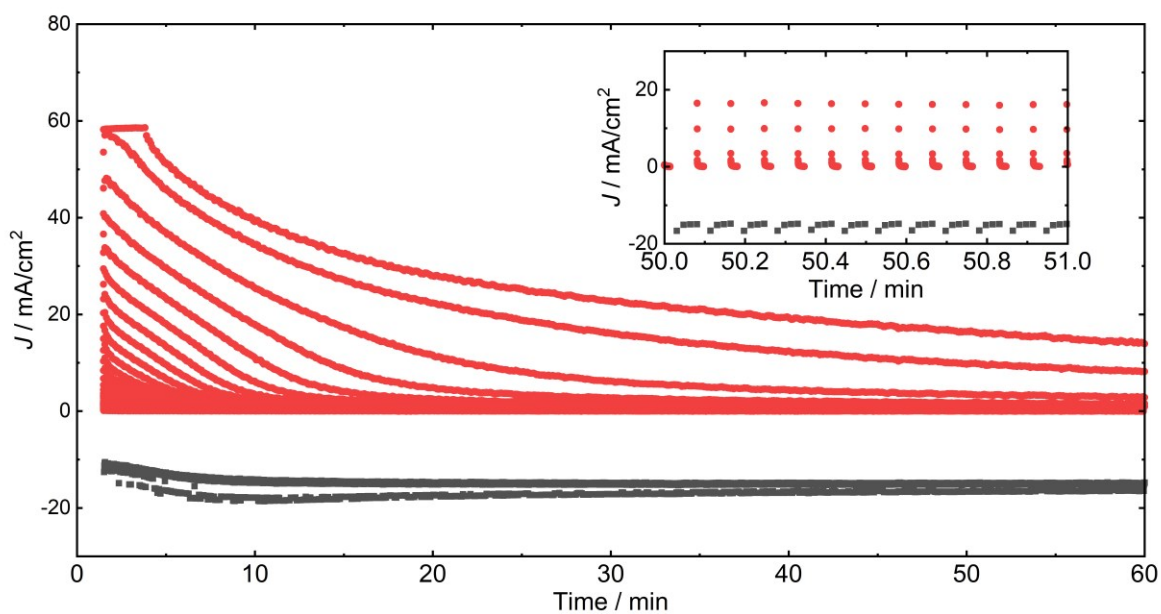

**Figure S17.** Temporal evolution of the current density  $J$  of the Cu-Zn catalyst under pulsed electrolysis with  $E_c = -1.0$  V,  $E_a = 0$  V, and  $t_c = 4$  s, and  $t_a = 1$  s during 1 h of reaction in  $\text{CO}_2$ -saturated 0.1 M  $\text{KHCO}_3$ .

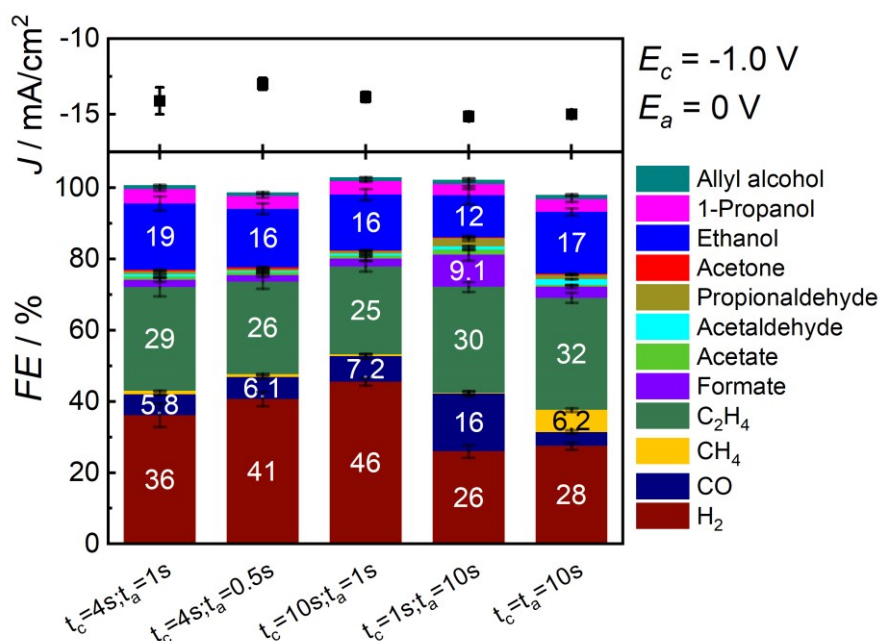

**Figure S18.** Averaged current densities (top) and Faradaic efficiencies (bottom) of the Cu-Zn catalyst under pulsed electrolysis conditions with a fixed cathodic potential  $E_c$  and anodic potential  $E_a$  values at -1.0 V and 0 V, respectively, and varied cathodic and anodic time lengths  $t_c$  and  $t_a$  during 1 h of reaction in  $CO_2$ -saturated 0.1 M  $KHCO_3$ .

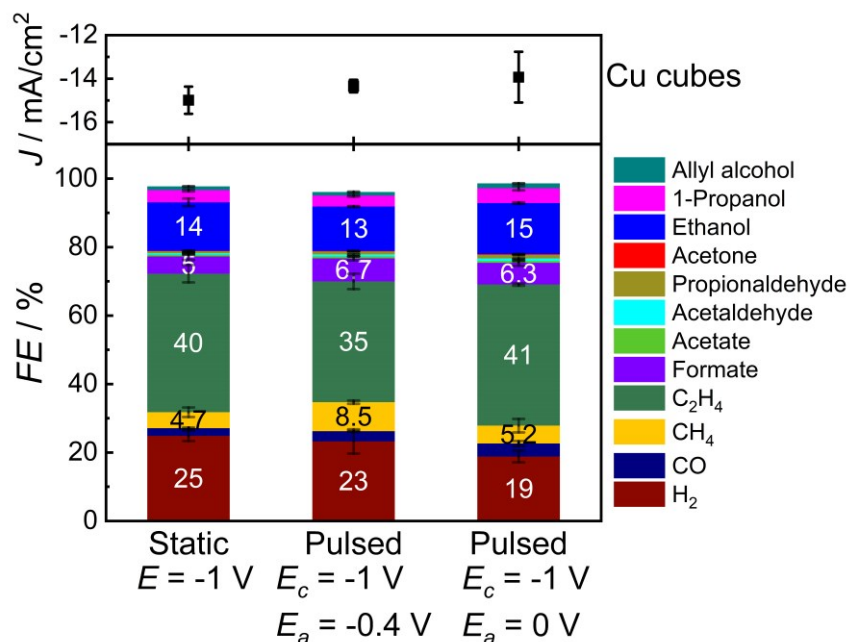

**Figure S19.** Averaged current densities (top) and Faradaic efficiencies (bottom) of Cu cubes as reference catalyst under static  $CO_2$ RR at -1.0 V and under pulsed electrolysis conditions with  $E_c = -1.0$  V,  $E_a = 0$  V,  $t_c = 4$  s and  $t_a = 1$  s during 1 h of reaction in  $CO_2$ -saturated 0.1 M  $KHCO_3$ .

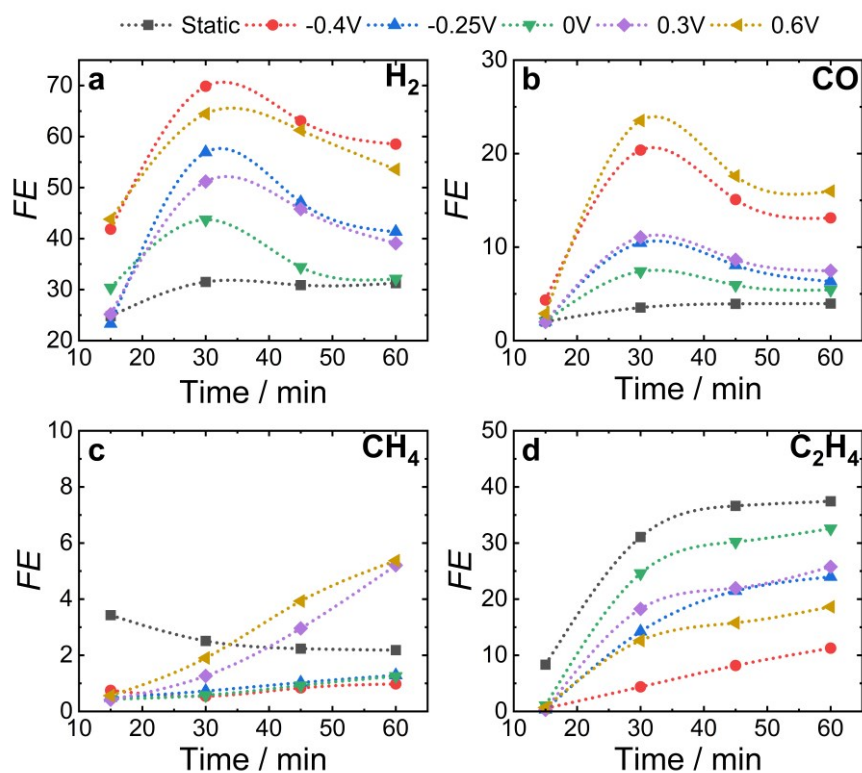

**Figure S20.** Evolution of the selectivities of the gaseous products during pulsed CO<sub>2</sub>RR with  $E_c = -1.0$  V,  $E_a = 0$  V,  $t_c = 4$  s, and  $t_a = 1$  s for 1 h of the pre-reduced Cu-Zn catalyst in CO<sub>2</sub>-saturated 0.1 M KHCO<sub>3</sub>. **a**, shows the Faradaic efficiency of hydrogen, **b**, carbon monoxide, **c**, methane, and **d**, ethylene.

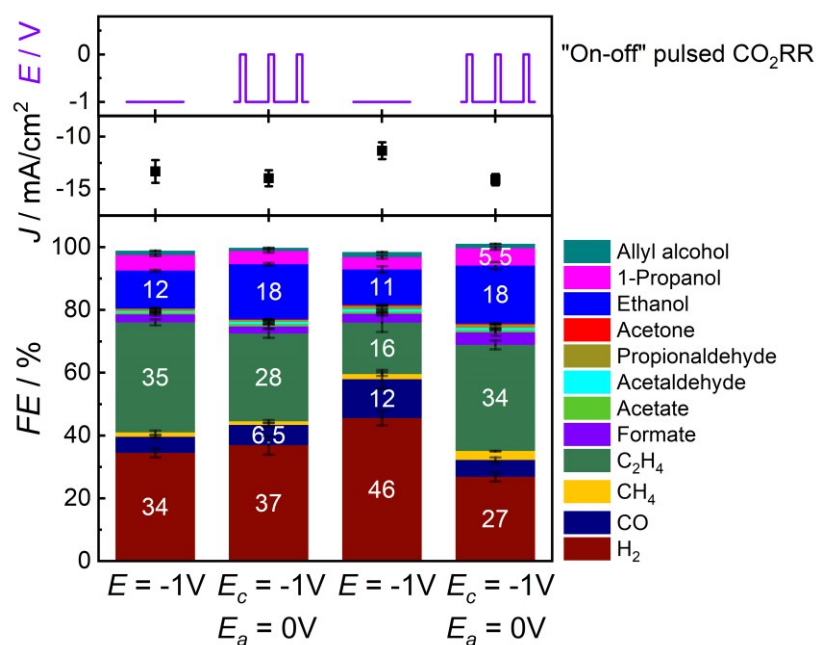

**Figure S21.** Schematic potential sequences (top), averaged current densities (middle), and Faradaic efficiencies (bottom) of the Cu-Zn catalyst under sequentially changing static CO<sub>2</sub>RR at -1.0 V for 1 h each time followed by pulsed CO<sub>2</sub>RR with  $E_c = -1.0$  V,  $E_a = 0$  V,  $t_c = 4$  s and  $t_a = 1$  s for 2 h each time in CO<sub>2</sub>-saturated 0.1 M KHCO<sub>3</sub>. Changes in the FEs were paralleled by a decrease in current density.

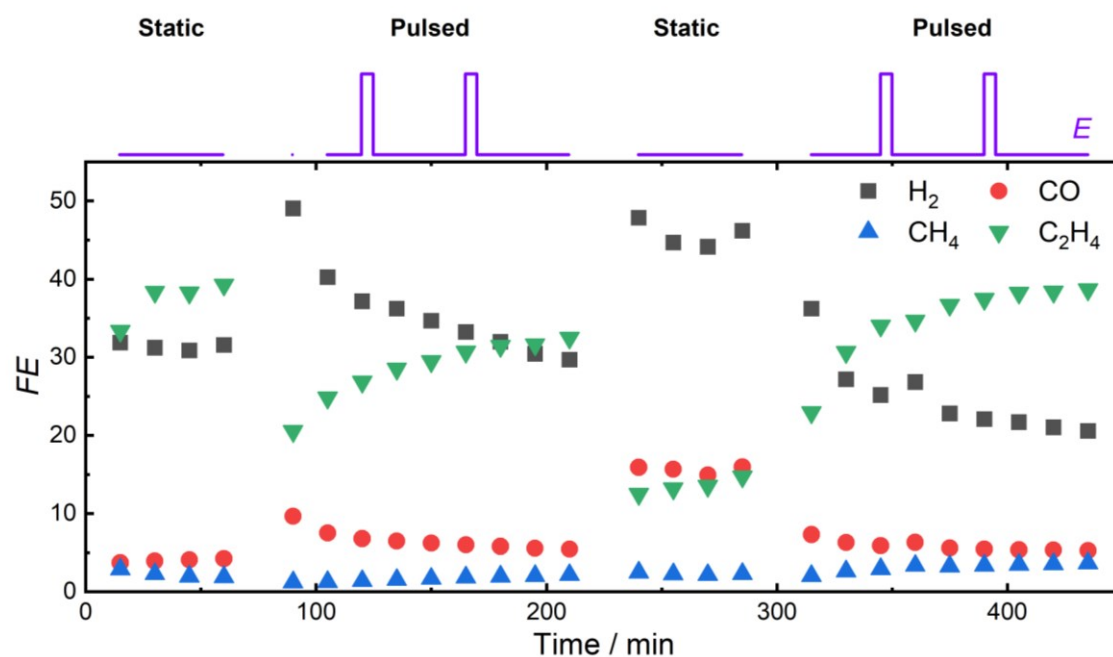

**Figure S22.** Temporal evolution of the selectivities of the gaseous products during static CO<sub>2</sub>RR for 1 h and pulsed CO<sub>2</sub>RR with  $E_c = -1.0$  V,  $E_a = 0$  V,  $t_c = 4$  s, and  $t_a = 1$  s for 2 h of the Cu-Zn catalyst in CO<sub>2</sub>-saturated 0.1 M KHCO<sub>3</sub>. The reaction time was set to 2 h of pulsed CO<sub>2</sub>RR to ensure a stabilized selectivity evolution due to the activation time of the catalyst. The gaseous products here are hydrogen, carbon monoxide, methane, and ethylene. Potential pulses are shown schematically. Interestingly, the time-dependent evolution of the gaseous products indicates an activation time for the C<sub>2+</sub> product formation of ~30 min after each (re-)started pulsed CO<sub>2</sub>RR experiment.

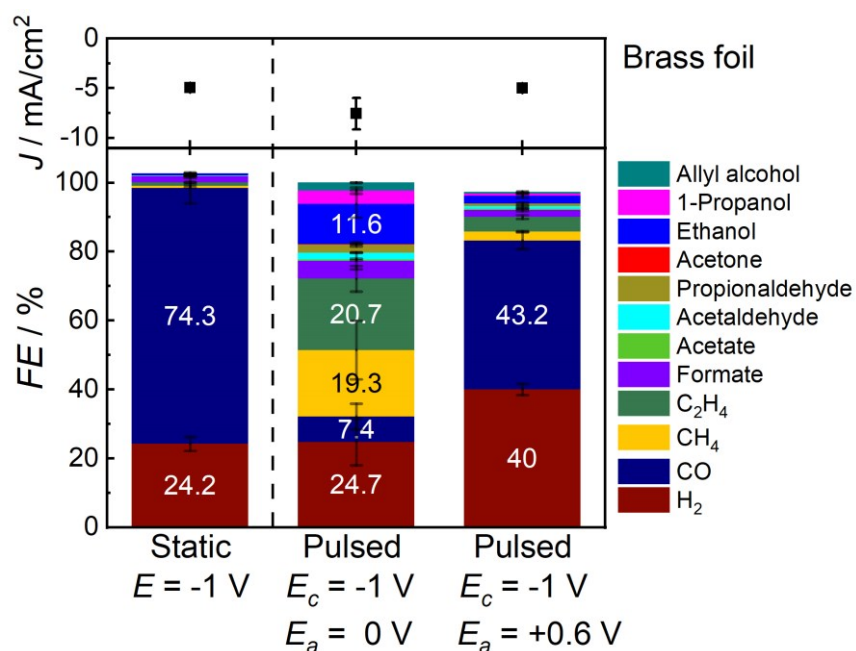

**Figure S23.** Averaged current densities (top) and Faradaic efficiencies (bottom) of a CuZn bulk brass foil as reference catalyst under static CO<sub>2</sub>RR at -1.0 V and under pulsed CO<sub>2</sub>RR with  $E_c = -1.0$  V and  $E_a = 0$  V or 0.6 V, and  $t_c = 4$  s and  $t_a = 1$  s during 1 h of reaction in CO<sub>2</sub>-saturated 0.1 M KHCO<sub>3</sub>.



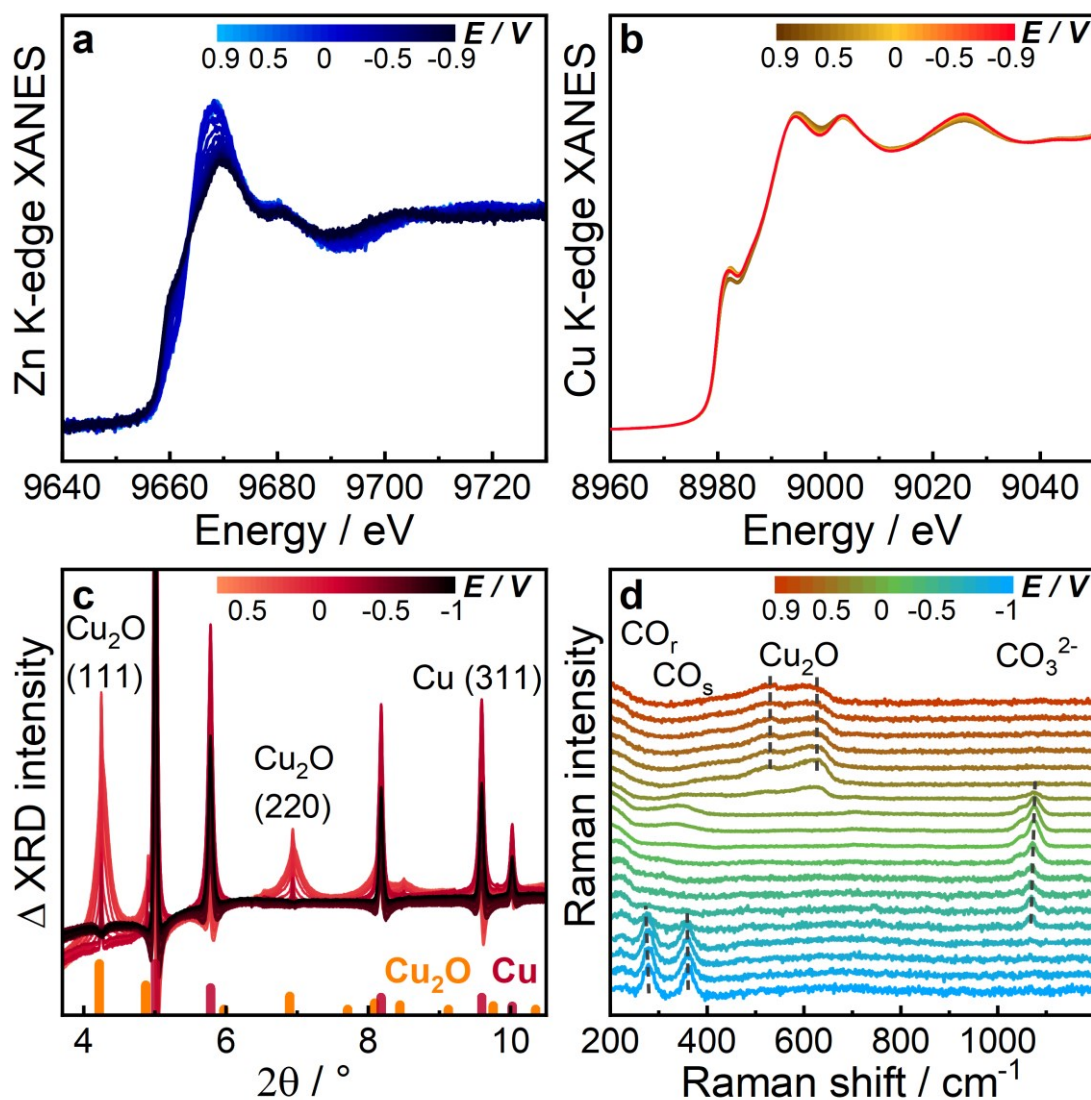

**Figure S24.** Averaged spectra and diffractograms during the cathodic scan of a CV voltammogram. **a,b**, XANES spectra of Zn K-edge and Cu K-edge, respectively, during from 0.9 to -0.9 V. **c**, Averaged  $\Delta$  HE-XRD patterns (after subtraction of the XRD pattern acquired during static  $\text{CO}_2\text{RR}$  at -1.0 V before CV) from -0.7 to -1.0 V. **d**, Averaged SERS spectra obtained while changing the potential from 0.9 to -1.0 V. The Cu-Zn sample was pre-reduced for 1 h at -1.0 V under  $\text{CO}_2\text{RR}$  conditions before the CV in  $\text{CO}_2$ -saturated 0.1 M  $\text{KHCO}_3$ .

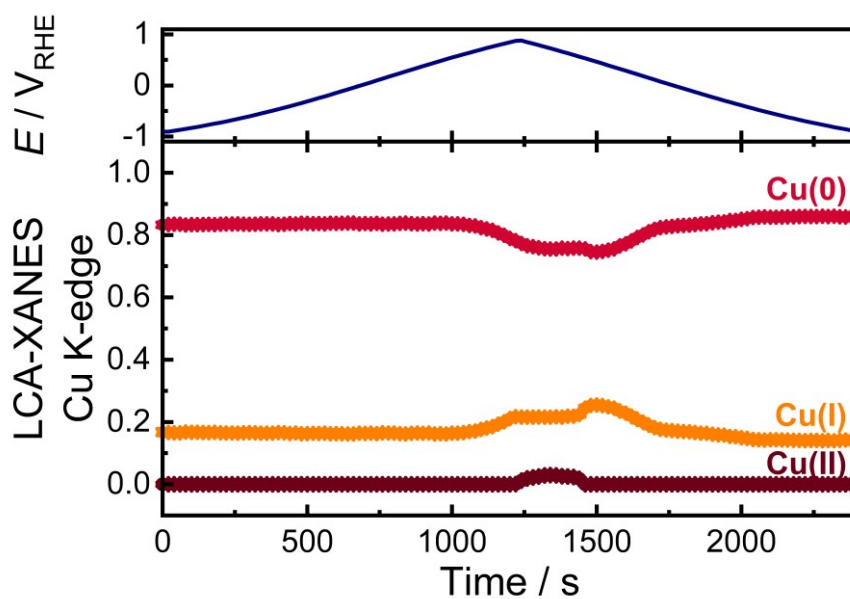

**Figure S25.** LCA-XANES analysis results of Cu K-edge of pre-reduced Cu-Zn catalyst during a CV scan from  $-0.9\text{ V} \rightarrow 0.9\text{ V} \rightarrow -0.9\text{ V}$  in  $\text{CO}_2$ -saturated  $0.1\text{ M KHCO}_3$  with corresponding applied potential.

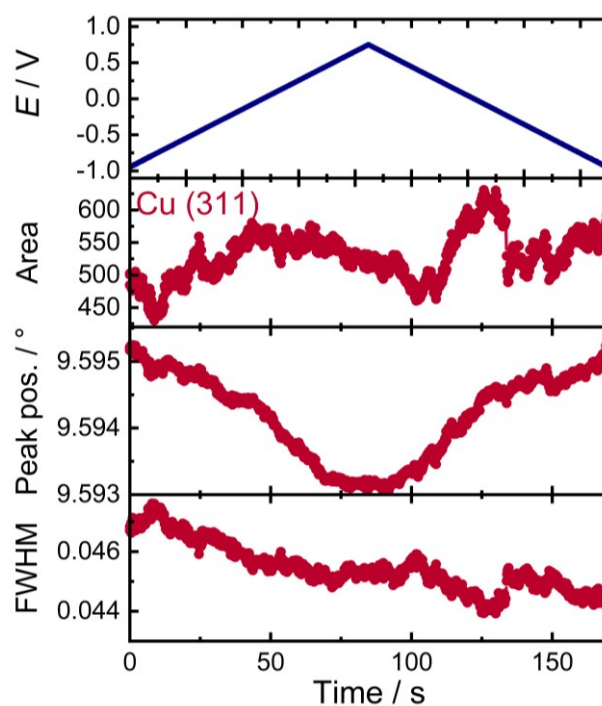

**Figure S26.** Fits of HE-XRD patterns of Cu(311) of the Cu-Zn catalyst during CV from  $-1.0\text{ V} \rightarrow 0.7\text{ V} \rightarrow -1.0\text{ V}$  in  $\text{CO}_2$ -saturated  $0.1\text{ M KHCO}_3$ . Area (second row), peak position (third row) and FWHM (fourth row) extracted from fits of Cu(311) with respect to the applied potential (top row).

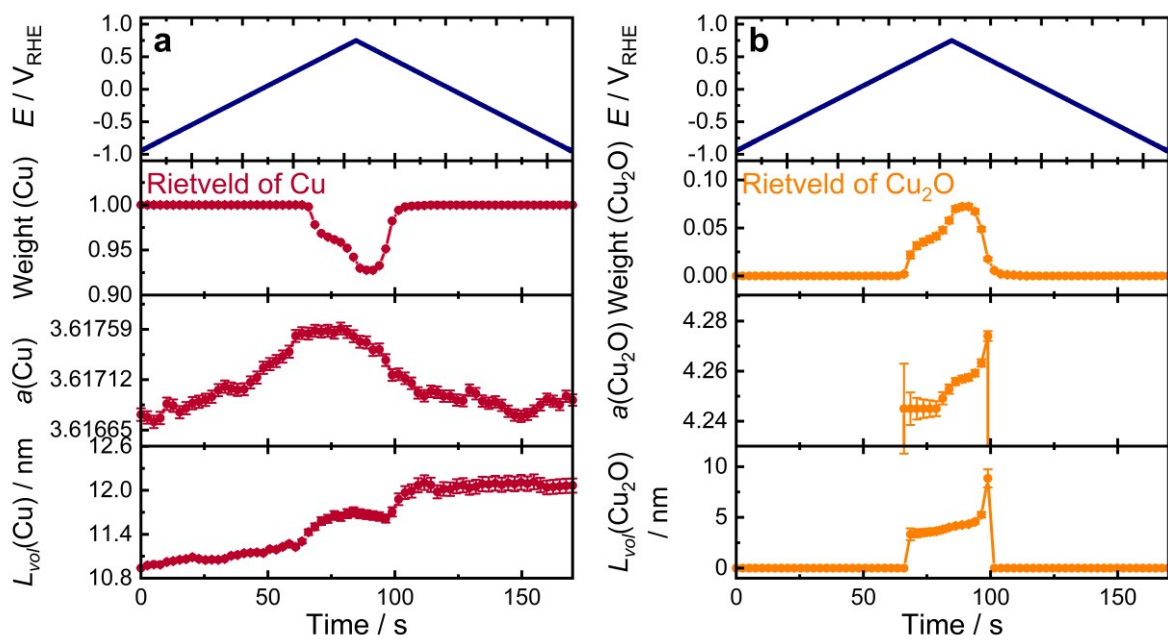

**Figure S27.** Rietveld analysis of HE-XRD pattern of **a**, Cu and **b**,  $\text{Cu}_2\text{O}$  of the Cu-Zn catalyst during a CV from -1.0 V  $\rightarrow$  0.7 V  $\rightarrow$  -1.0 V in  $\text{CO}_2$ -saturated 0.1 M  $\text{KHCO}_3$ . Weight (second row), lattice parameter  $a$  (third row) and coherence length  $L_{\text{vol}}$  (fourth row) in respect to the applied potential (top row).

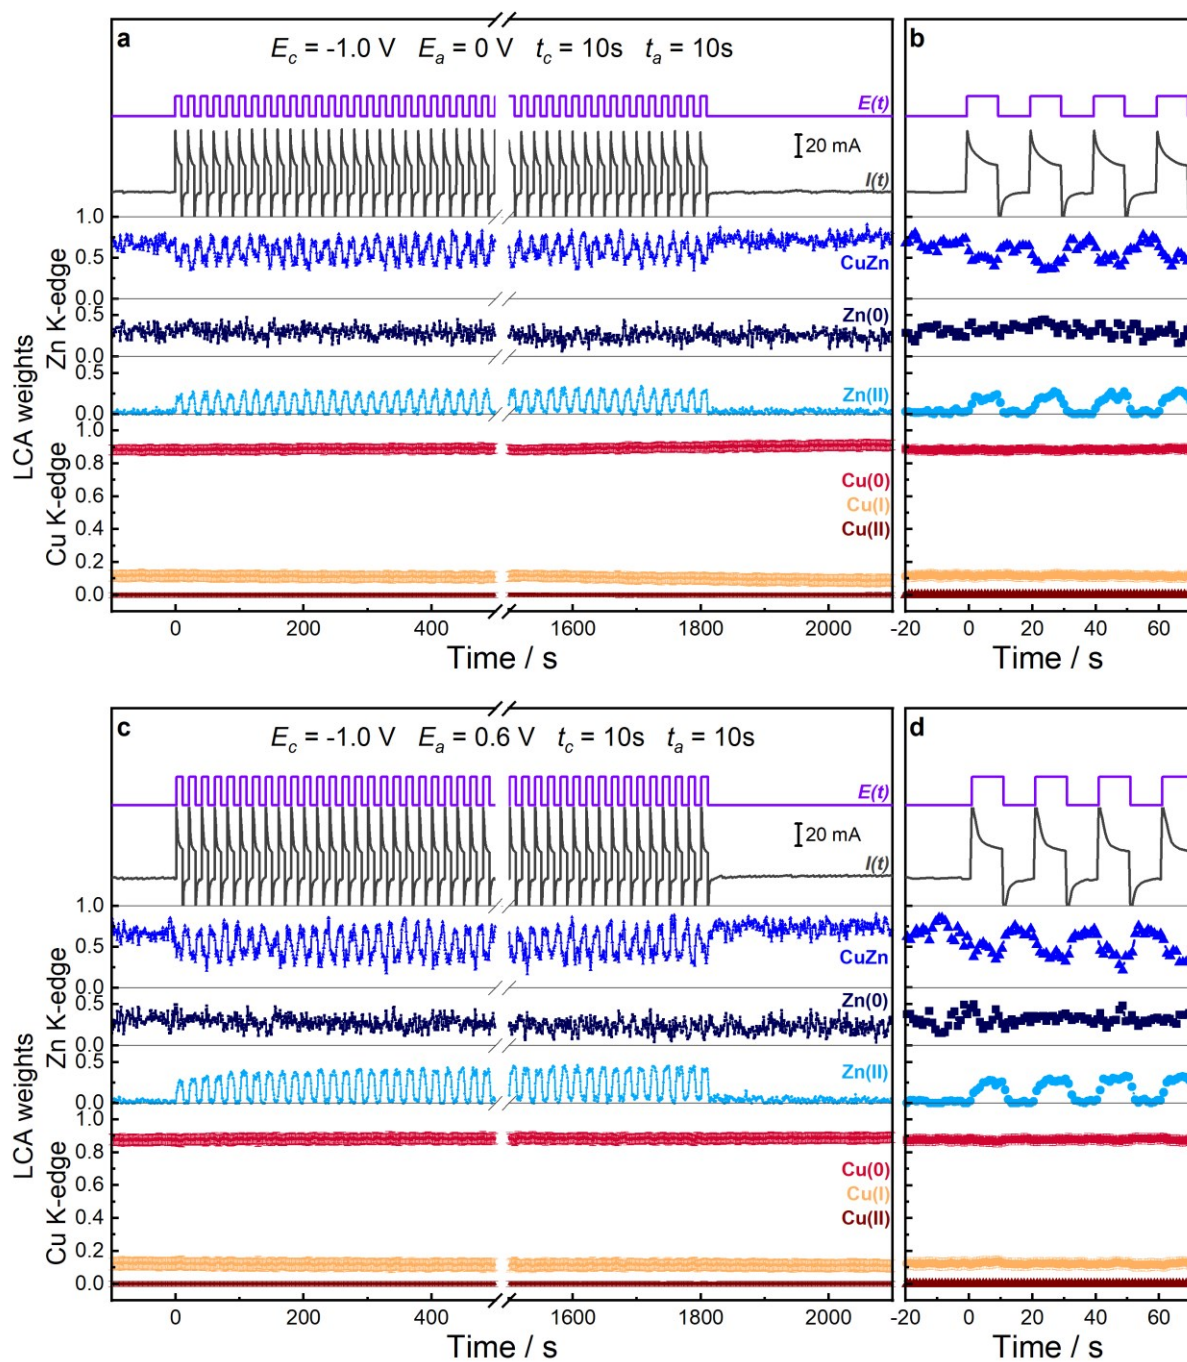

**Figure S28.** LCA-XANES analysis results of the Zn and Cu K-edges of pre-reduced Cu-Zn catalyst during pulsed CO<sub>2</sub>RR with  $t_c = t_a = 10$  s in CO<sub>2</sub>-saturated 0.1 M KHCO<sub>3</sub>.  $E_c$  is constant at -1.0 V, while **a,b**, are at  $E_a = 0$  V and **c,d**, are at  $E_a = 0.6$  V. **b,d**, show an extract of the full-time pulsed CO<sub>2</sub>RR for better visibility.

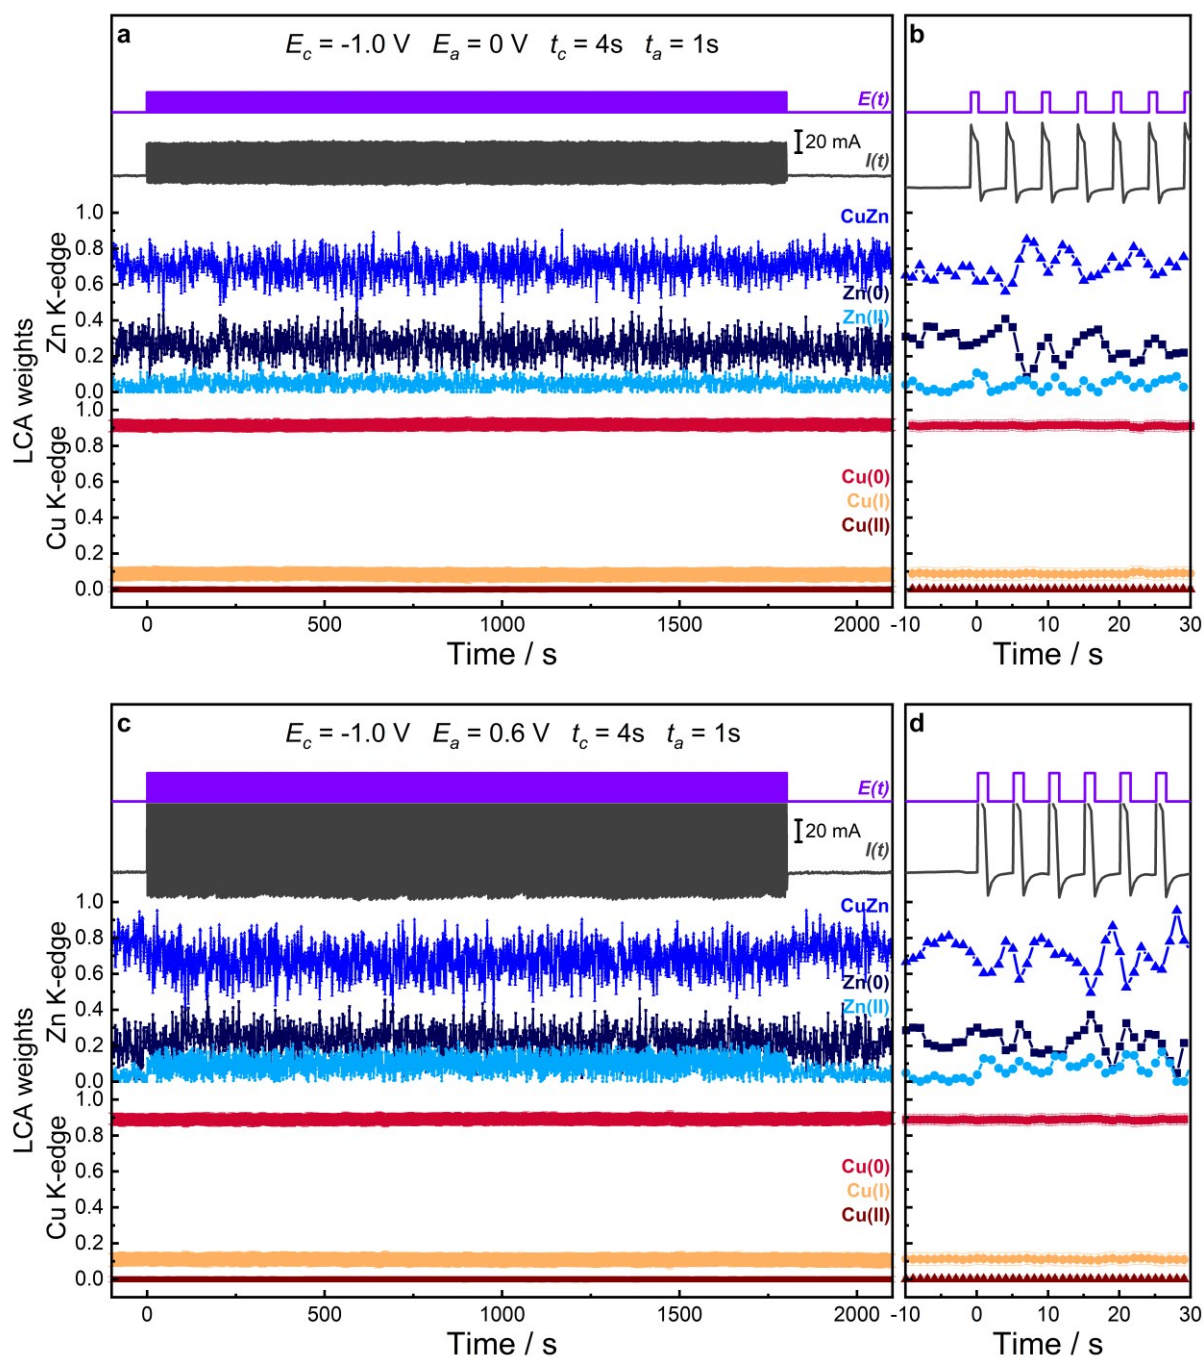

**Figure S29.** LCA-XANES analysis results of the Zn and Cu K-edges of pre-reduced Cu-Zn catalyst during pulsed CO<sub>2</sub>RR with  $t_c = 4\text{ s}$  and  $t_a = 1\text{ s}$  in CO<sub>2</sub>-saturated 0.1 M KHCO<sub>3</sub>.  $E_c$  is constant at -1.0 V, while **a,b**, are at  $E_a = 0\text{ V}$  and **c,d**, are at  $E_a = 0.6\text{ V}$ . **b,d**, show an extract of the full-time pulsed CO<sub>2</sub>RR for better visibility.

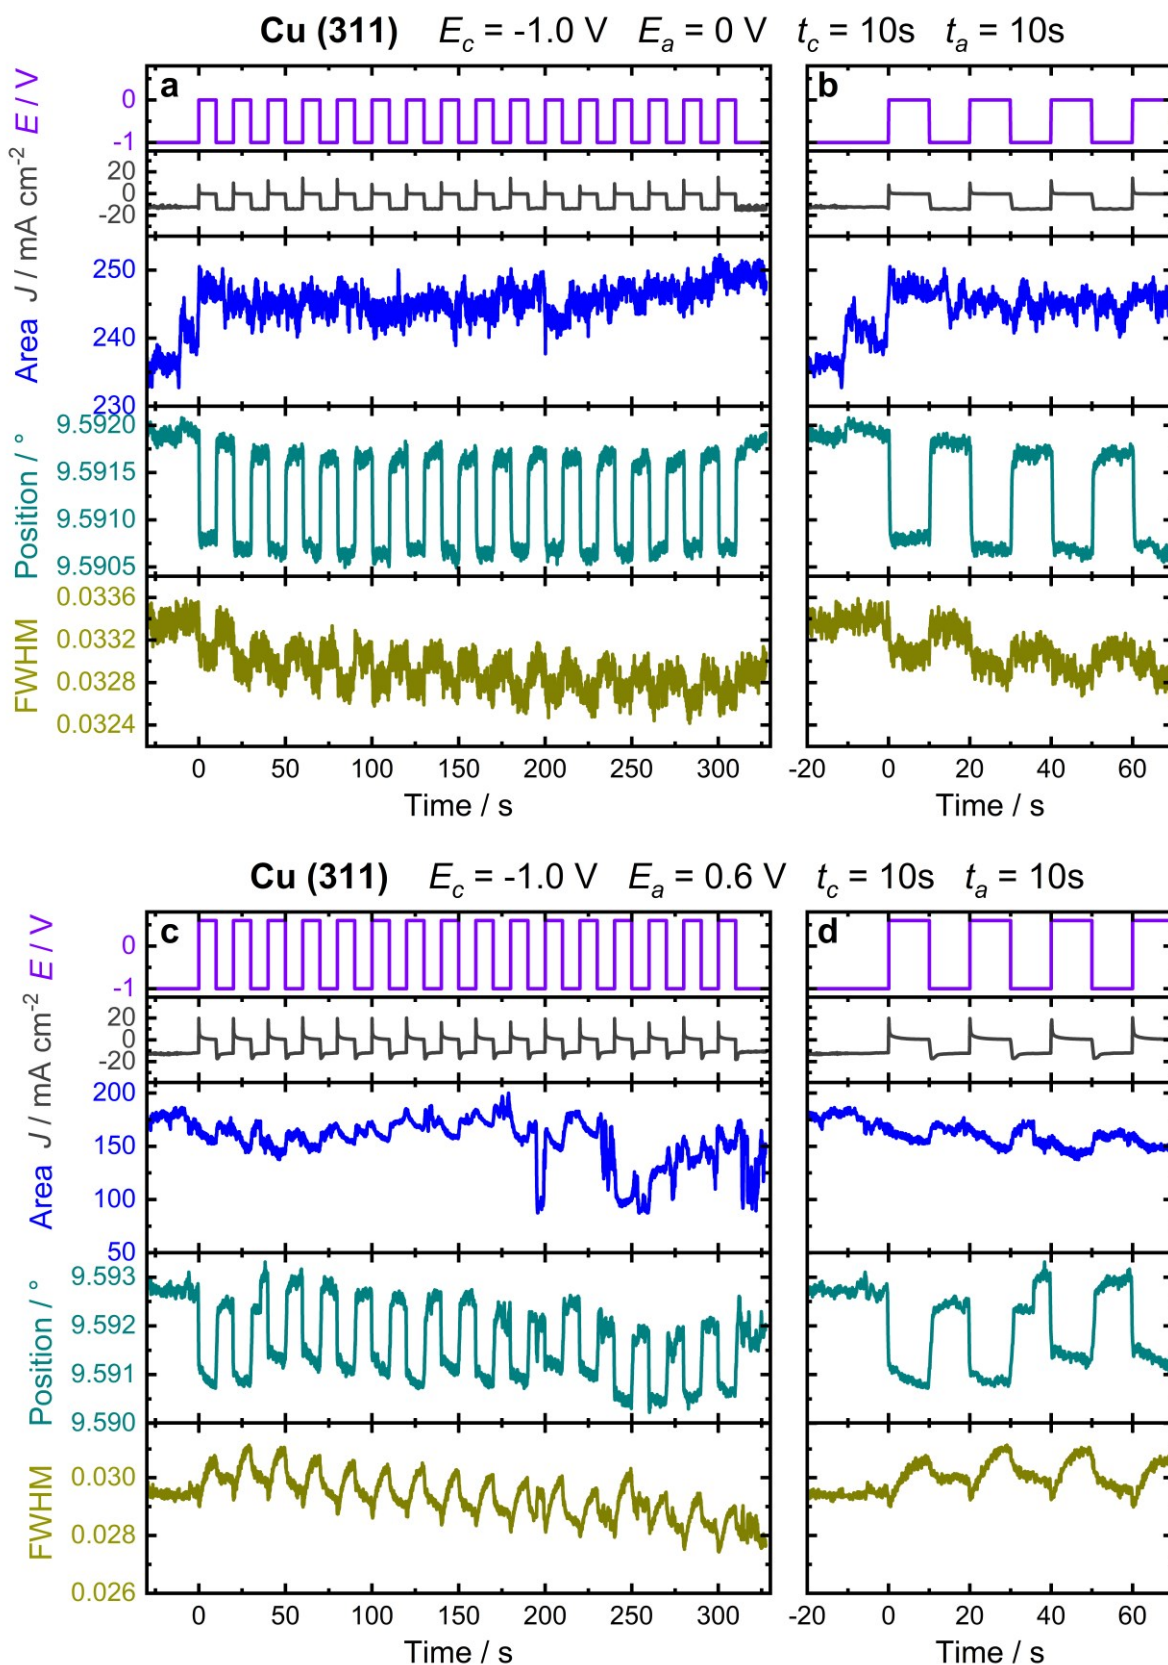

**Figure S30.** Temporal evolution of the area, peak position, and FWHM extracted from the fits of Cu(311) of HE-XRD patterns with respect to the applied potential and current density (top) during pulsed  $\text{CO}_2\text{RR}$  with  $t_c = t_a = 10\text{ s}$  in  $\text{CO}_2$ -saturated  $0.1\text{ M KHCO}_3$ .  $E_c$  is constant at  $-1.0\text{ V}$ , while **a,b**, are at  $E_a = 0\text{ V}$  and **c,d**, are at  $E_a = 0.6\text{ V}$ . **b,d**, show an extract of the full-time pulsed  $\text{CO}_2\text{RR}$  for better visibility.

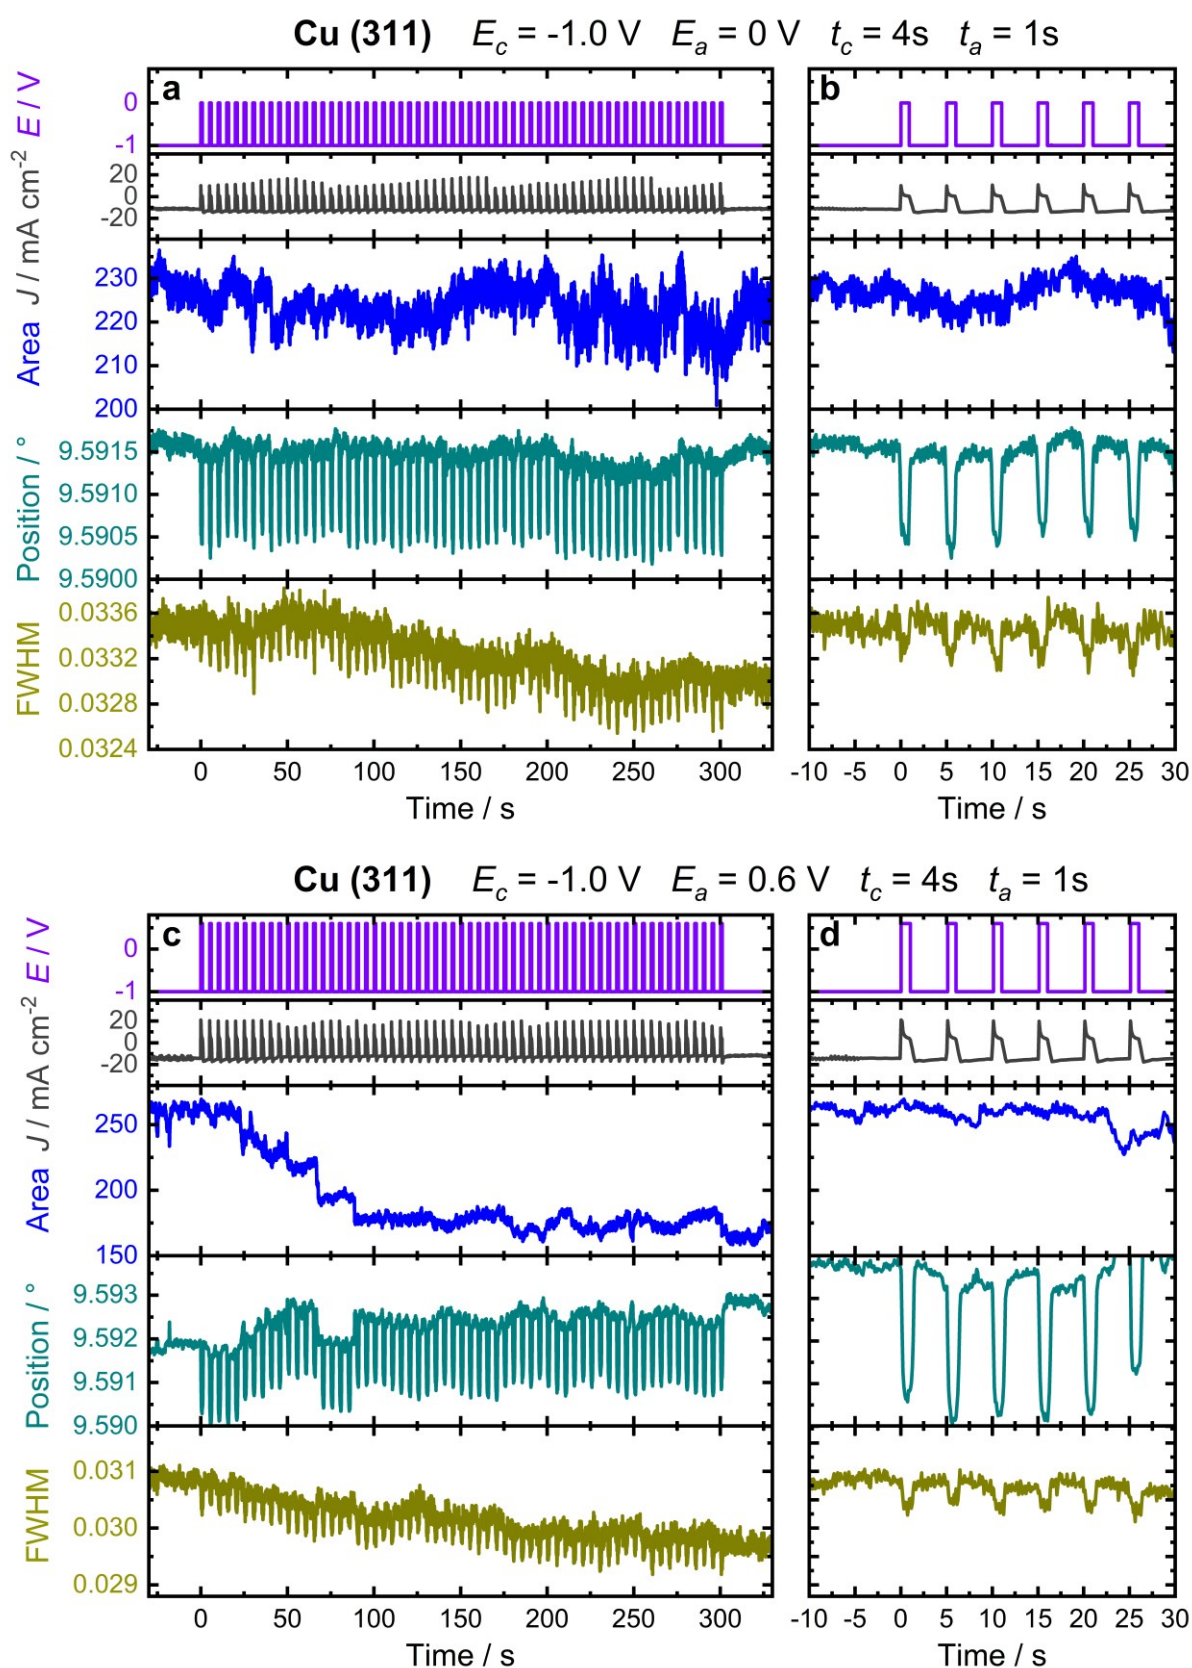

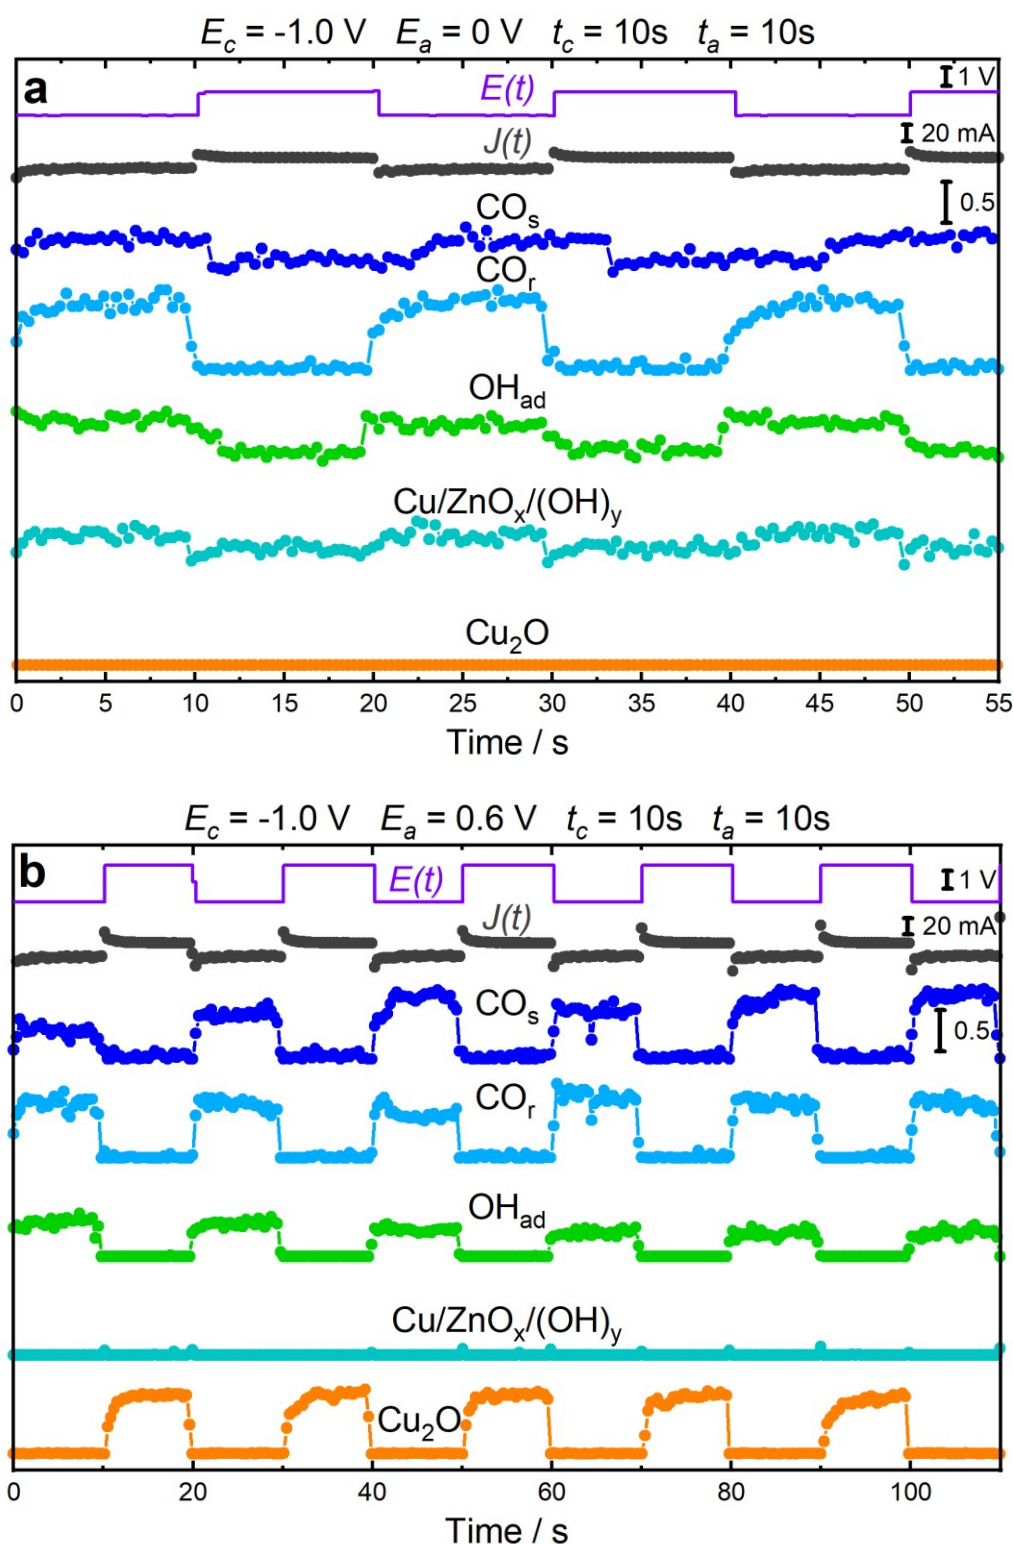

**Figure S32.** Temporal evolution of the chemical state and adsorbate coverage as Cu-CO stretching ( $\text{CO}_s$ ,  $360 \text{ cm}^{-1}$ ) and rotation ( $\text{CO}_r$ ,  $280 \text{ cm}^{-1}$ ) vibrations,  $\text{OH}_{ad}$  vibration on Cu ( $490 \text{ cm}^{-1}$ ),  $\text{Cu/ZnO}_x/(\text{OH})_y$  species ( $370 \text{ cm}^{-1}$ ) and  $\text{Cu}_2\text{O}$  species ( $405, 530, 610 \text{ cm}^{-1}$ ) obtained by fitting the intensities of the bands from the SERS spectra with respect to the applied potential and current density (top) during pulsed  $\text{CO}_2\text{RR}$  in  $\text{CO}_2$ -saturated  $0.1 \text{ M KHCO}_3$  with  $t_c = t_a = 10 \text{ s}$ .  $E_c$  is constant at  $-1.0 \text{ V}$ , while **a,b**, are at  $E_a = 0 \text{ V}$  and **c,d**, are at  $E_a = 0.6 \text{ V}$ . **b,d**, show an extract of the full-time pulsed  $\text{CO}_2\text{RR}$  for better visibility.



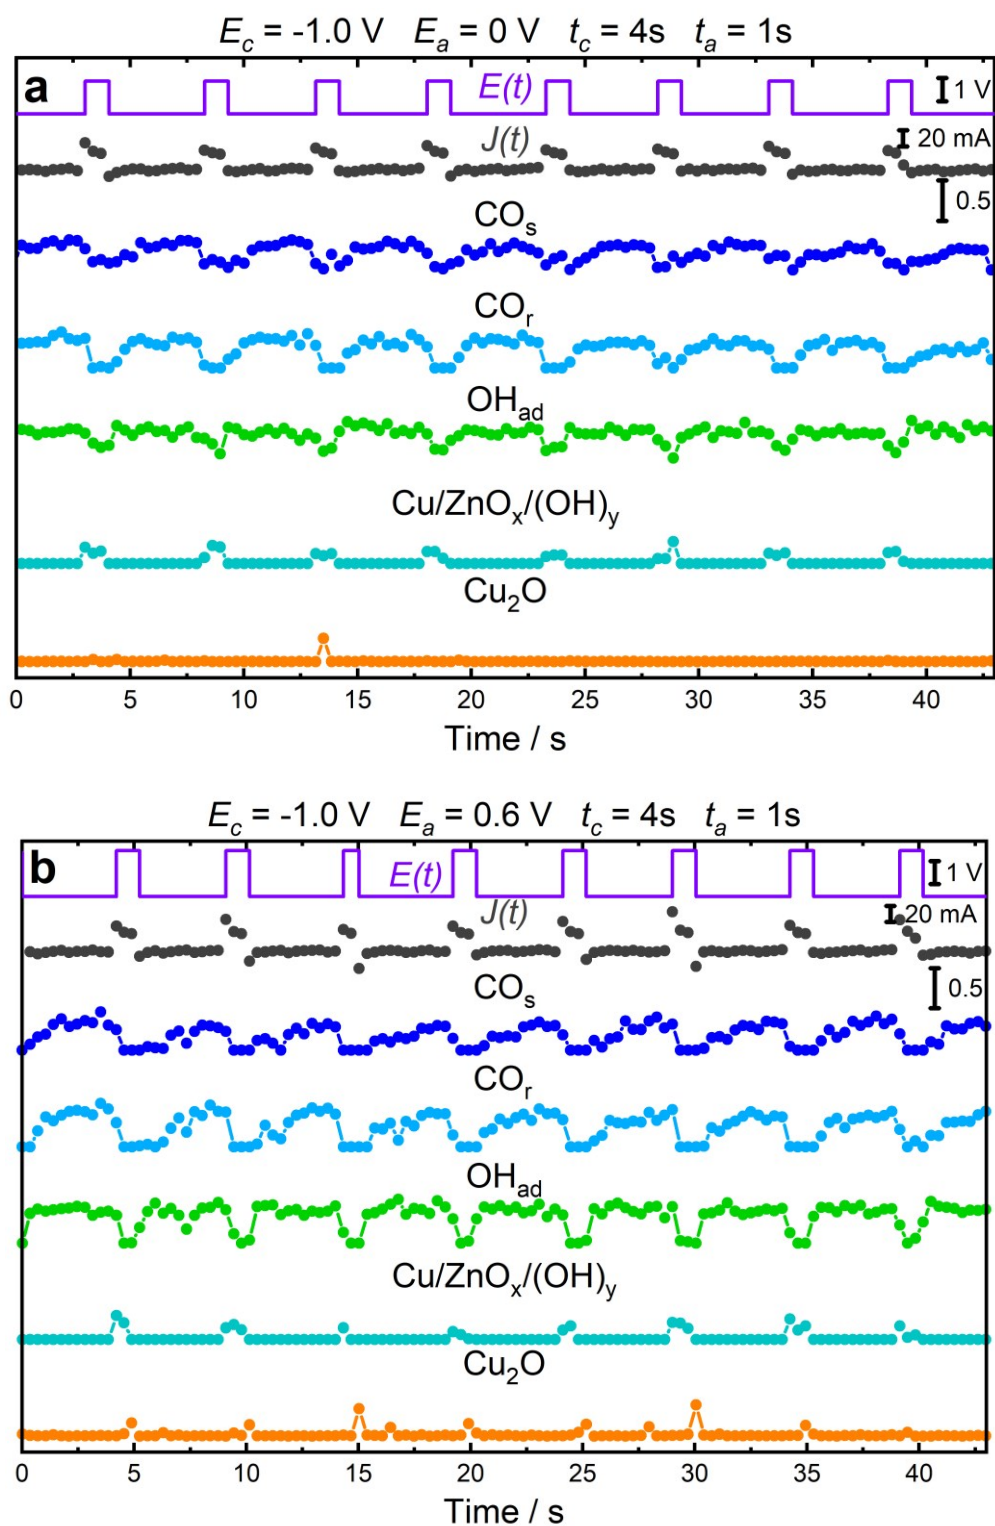

**Figure S33.** Temporal evolution of the chemical state and adsorbate coverage as Cu-CO stretching ( $\text{CO}_s$ ,  $360\text{ cm}^{-1}$ ) and rotation ( $\text{CO}_r$ ,  $280\text{ cm}^{-1}$ ) vibrations,  $\text{OH}_{ad}$  vibration on Cu ( $490\text{ cm}^{-1}$ ),  $\text{Cu/ZnO}_x/(\text{OH})_y$  species ( $370\text{ cm}^{-1}$ ) and  $\text{Cu}_2\text{O}$  species ( $405, 530, 610\text{ cm}^{-1}$ ) obtained by fitting the intensities of the bands from the SERS spectra with respect to the applied potential and current density (top) during pulsed CO<sub>2</sub>RR with  $t_c = 4\text{ s}$  and  $t_a = 1\text{ s}$  in CO<sub>2</sub>-saturated  $0.1\text{ M KHCO}_3$ .  $E_c$  is constant at  $-1.0\text{ V}$ , while **a,b**, are at  $E_a = 0\text{ V}$  and **c,d**, are at  $E_a = 0.6\text{ V}$ . **b,d**, show an extract of the full-time pulsed CO<sub>2</sub>RR for better visibility.

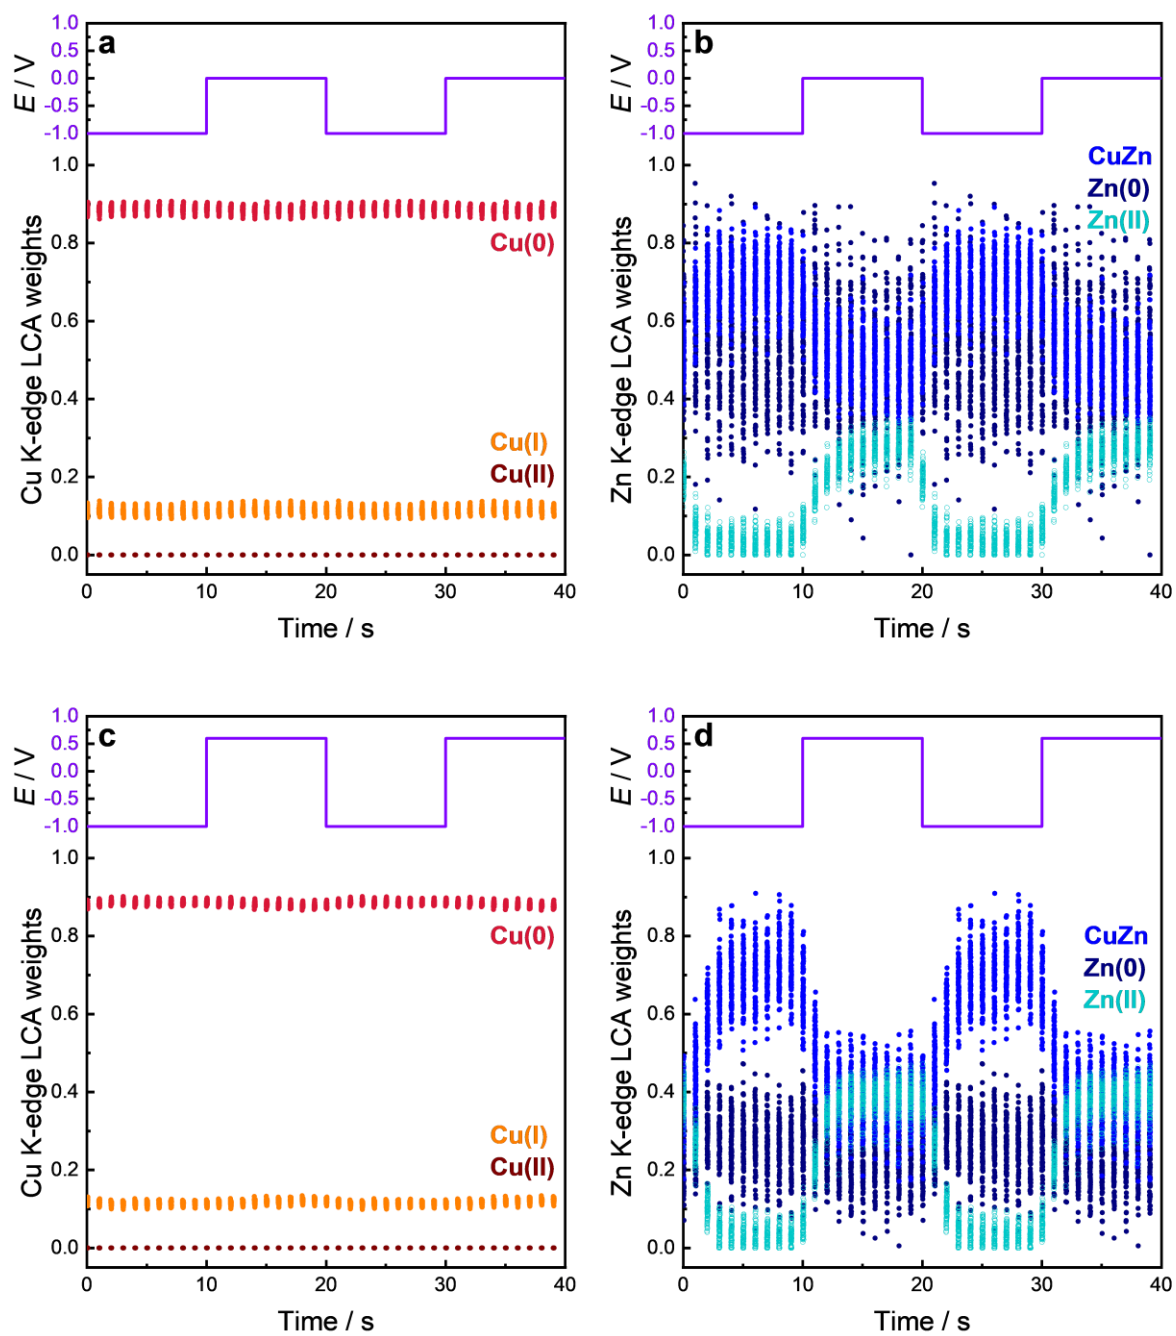

**Figure S34.** LCA-XANES analysis results of Cu and Zn, K-edges of pre-reduced Cu-Zn catalyst, averaged over one pulse sequence during pulsed  $\text{CO}_2\text{RR}$  with  $t_c = t_a = 10$  s in  $\text{CO}_2$ -saturated 0.1 M  $\text{KHCO}_3$ .  $E_c$  is constant at -1.0 V, while **a,b**, are at  $E_a = 0$  V and **c,d**, are at  $E_a = 0.6$  V.

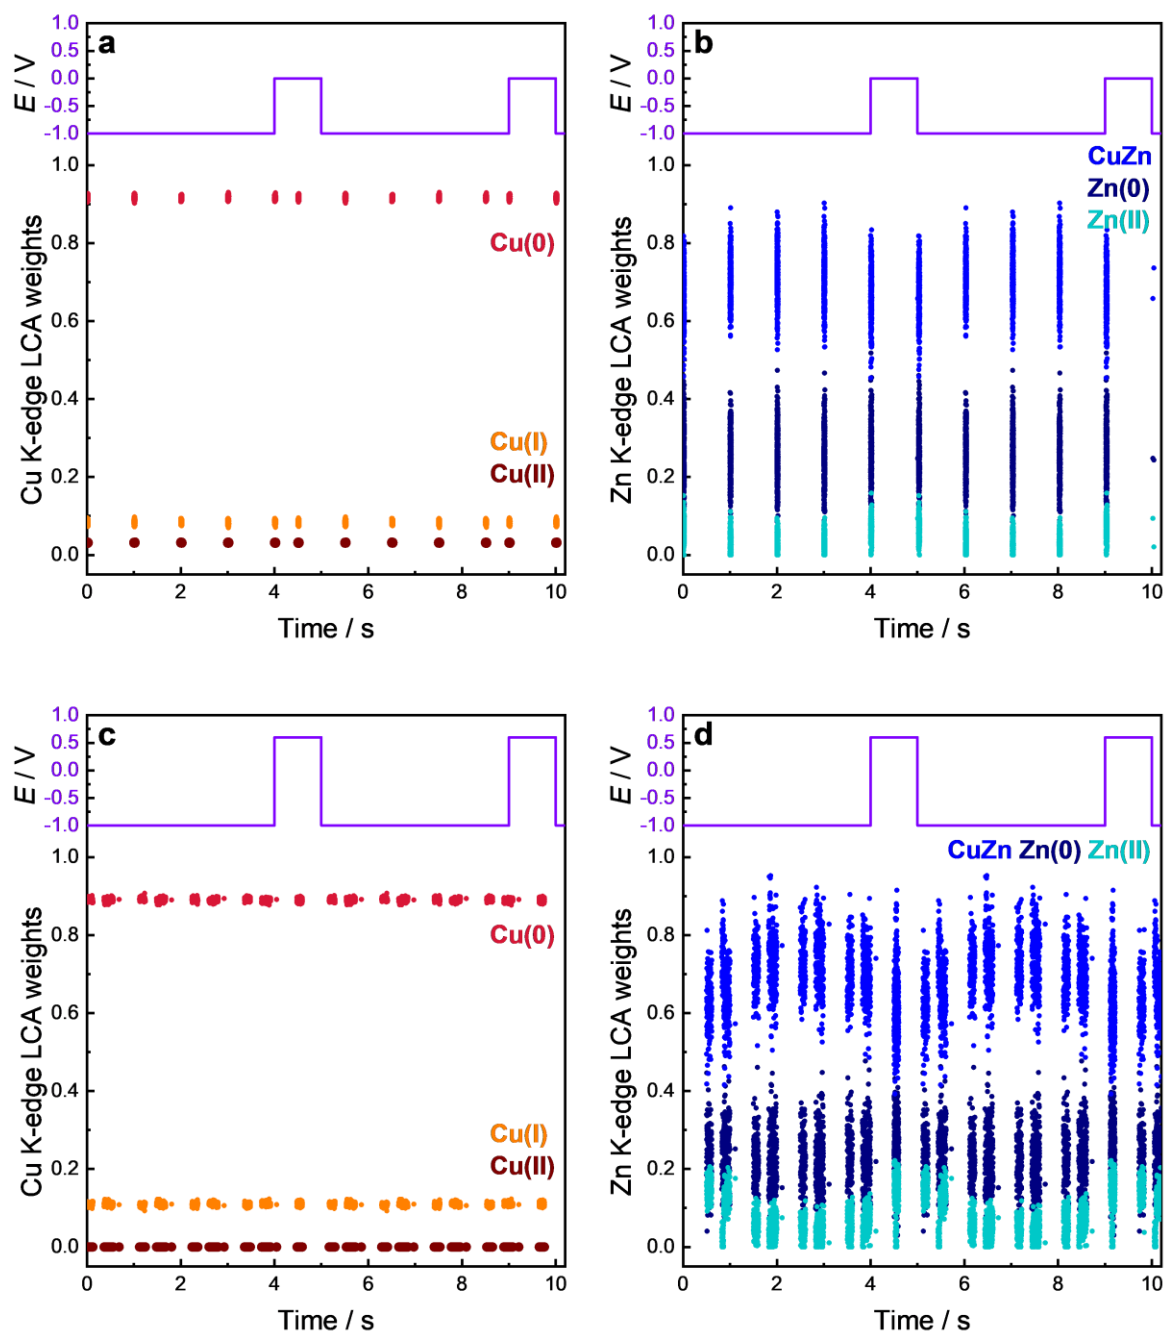

**Figure S35.** LCA-XANES analysis results of Cu and Zn, K-edge of pre-reduced Cu-Zn catalyst, averaged over one pulse sequence during pulsed CO<sub>2</sub>RR with  $t_c = 4$  s and  $t_a = 1$  s in CO<sub>2</sub>-saturated 0.1 M KHCO<sub>3</sub>.  $E_c$  is constant at -1.0 V, while **a,b**, are at  $E_a = 0$  V and **c,d**, are at  $E_a = 0.6$  V.

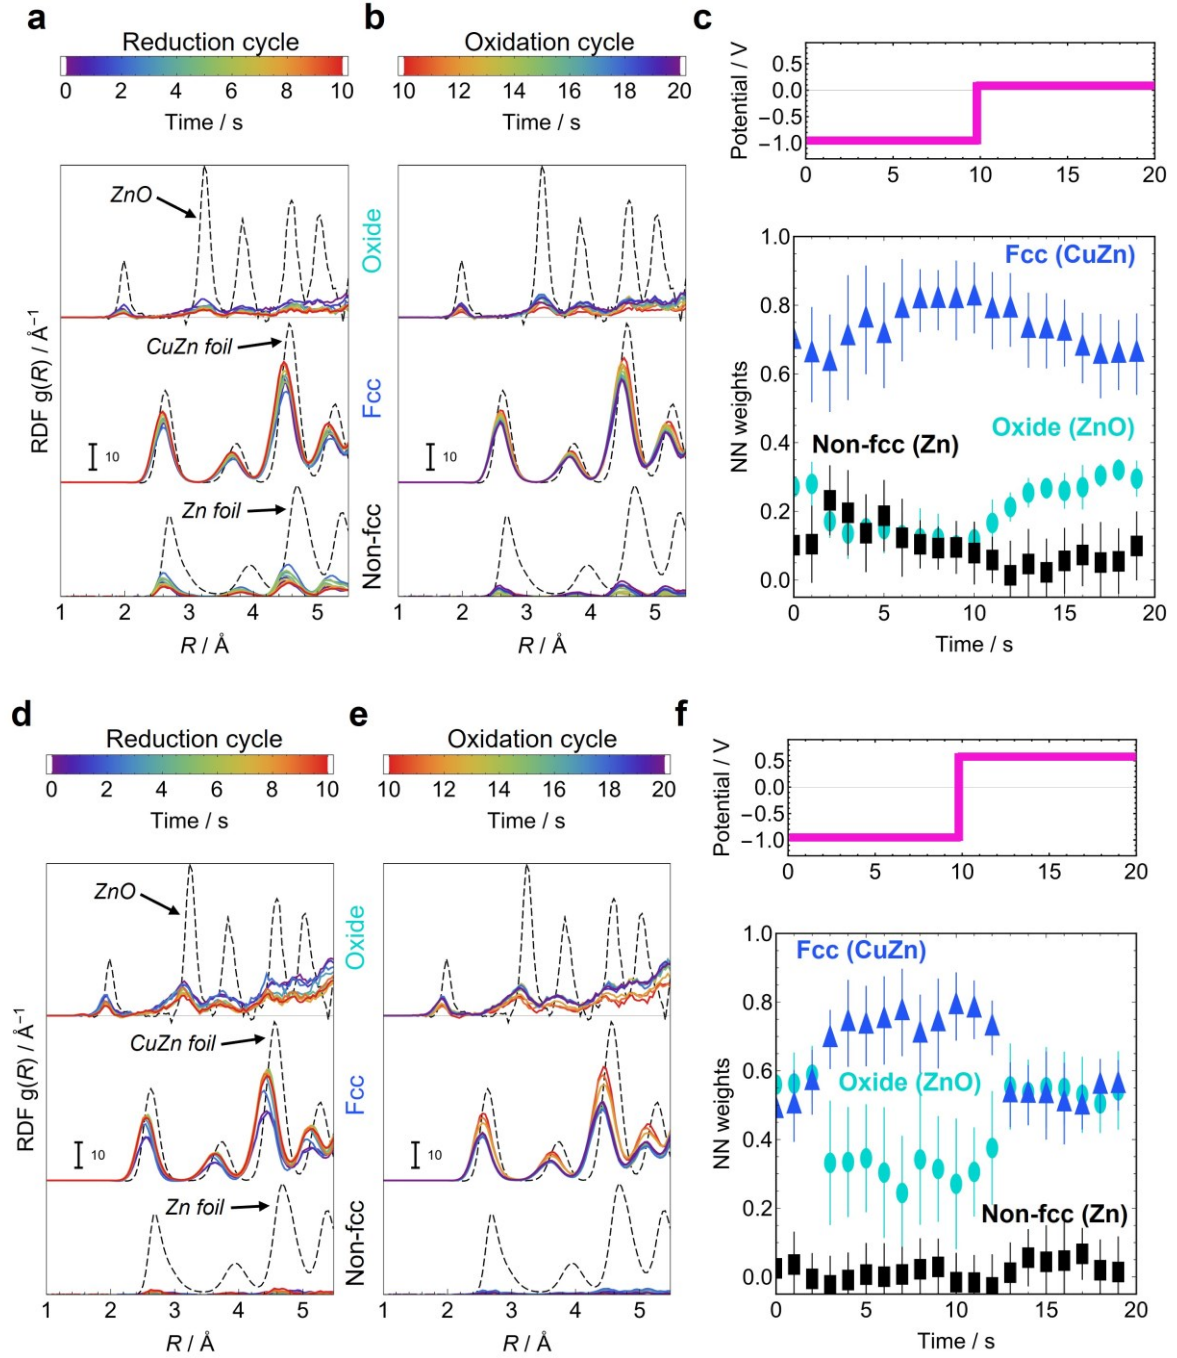

**Figure S36.** Averaged time-dependent evolution of the radial distribution functions  $g(R)$  and the concentrations obtained by the NN-EXAFS analysis from operando Zn K-edge EXAFS data during pulsed CO<sub>2</sub>RR with  $t_c = t_a = 10$  s in CO<sub>2</sub>-saturated 0.1 M KHCO<sub>3</sub>. The partial RDFs correspond to an oxide phase, an fcc-type Cu-Zn alloy phase, and a non-fcc-type phase Zn-rich face. **a,b**, RDFs during the reduction and oxidation cycle, respectively, and **c**, NN weights at  $E_c = -1.0$  V and  $E_a = 0$  V. **d,e**, RDFs during the reduction and oxidation cycle, respectively, and **f**, NN weights at  $E_c = -1.0$  V and  $E_a = 0.6$  V. For clarity the RDFs are shifted vertically.

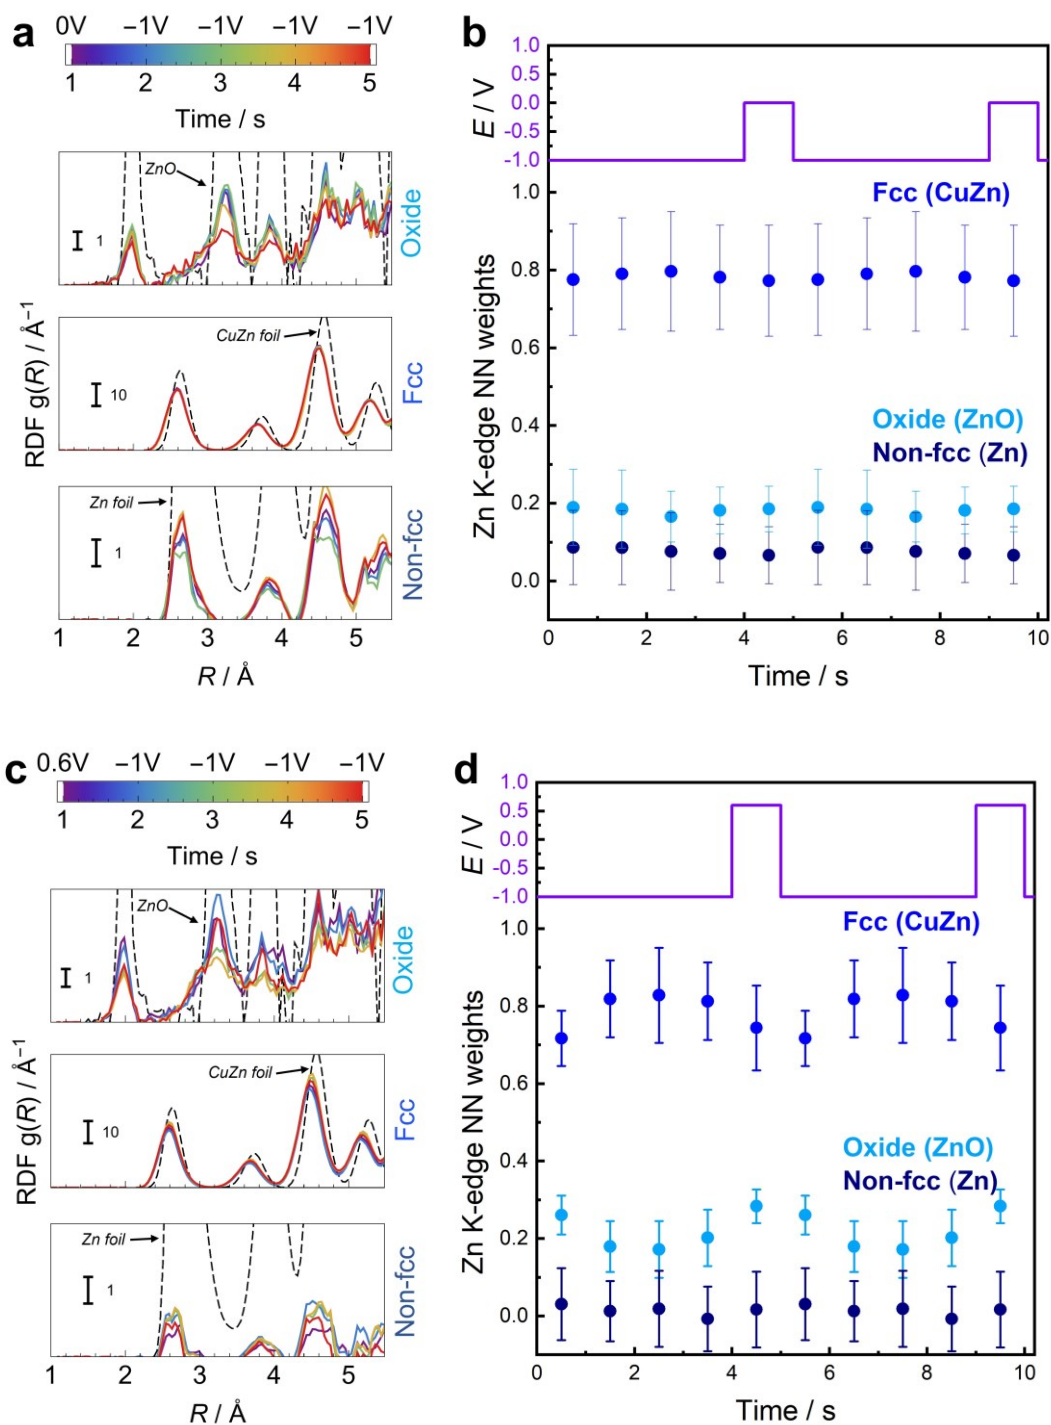

**Figure S37.** Averaged time-dependent evolution of the radial distribution functions  $g(R)$  (RDFs) and the concentrations obtained by the NN-EXAFS analysis from operando Zn K-edge EXAFS data during pulsed CO<sub>2</sub>RR with  $t_c = 4$  s and  $t_a = 1$  s in CO<sub>2</sub>-saturated 0.1 M KHCO<sub>3</sub>. The partial RDFs correspond to an Zn oxide phase, an Cu-Zn fcc-type phase, and a non-fcc-type Zn-rich phase. **a**, RDFs during the reduction and oxidation cycle, and **b**, NN weights at  $E_c = -1.0$  V and  $E_a = 0$  V. **c**, RDFs during the reduction and oxidation cycle, and **d**, NN weights at  $E_c = -1.0$  V and  $E_a = 0.6$  V. For clarity the RDFs are shifted vertically.

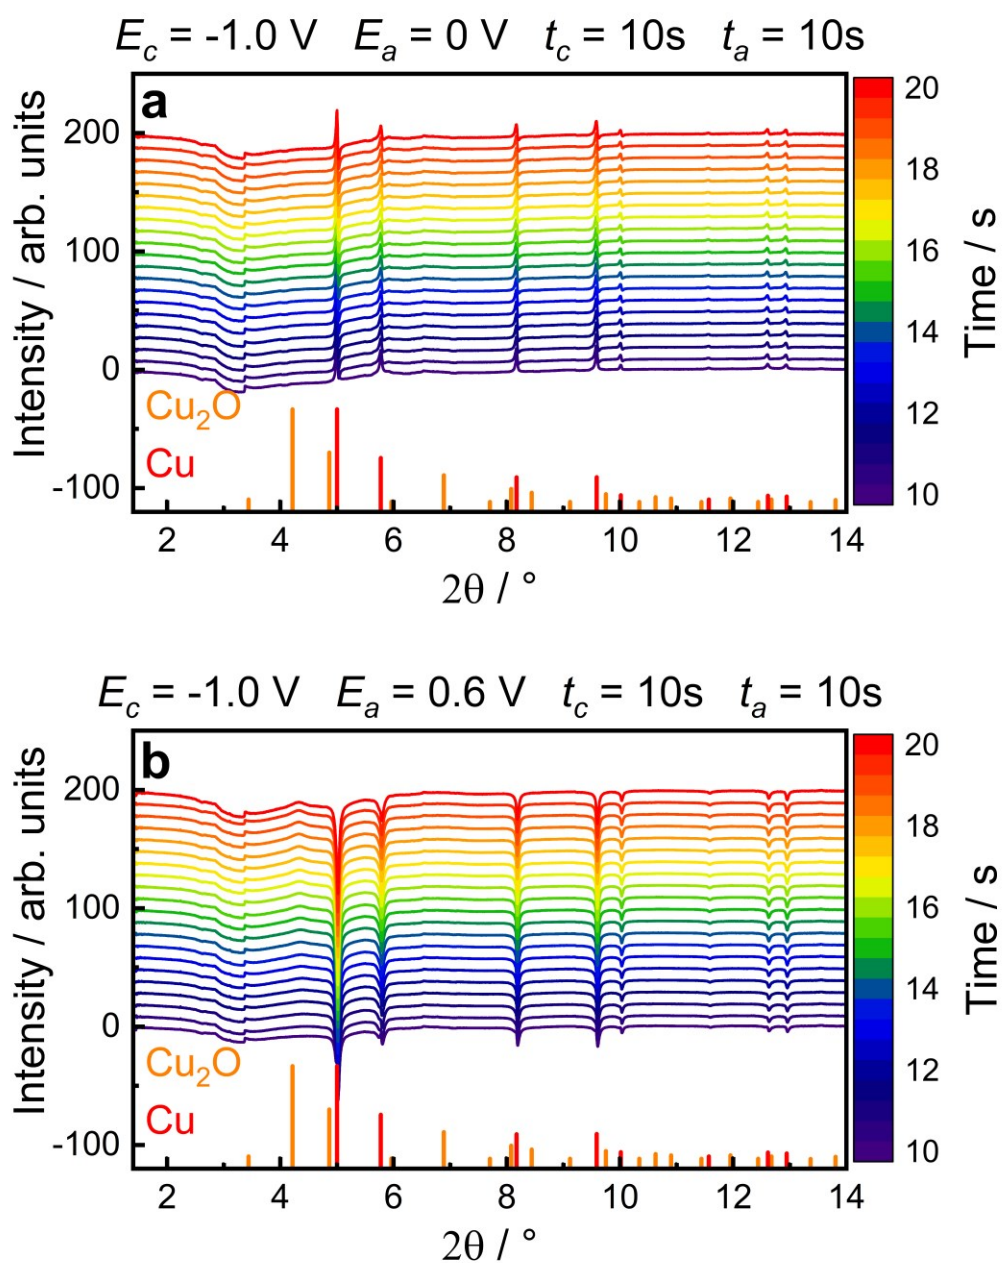

**Figure S38.** Evolution of the differential HE-XRD patterns of the pre-reduced Cu-Zn catalyst during the anodic pulse with  $t_c = t_a = 10 \text{ s}$  and **a**,  $E_a = 0 \text{ V}$  and **b**,  $0.6 \text{ V}$  in  $\text{CO}_2$ -saturated  $0.1 \text{ M KHCO}_3$ . The averaged diffraction patterns during the anodic pulse ( $t = 10\text{-}20 \text{ s}$ ) are subtracted from the averaged time-dependent diffraction pattern collected under pulsed  $\text{CO}_2\text{RR}$  conditions.

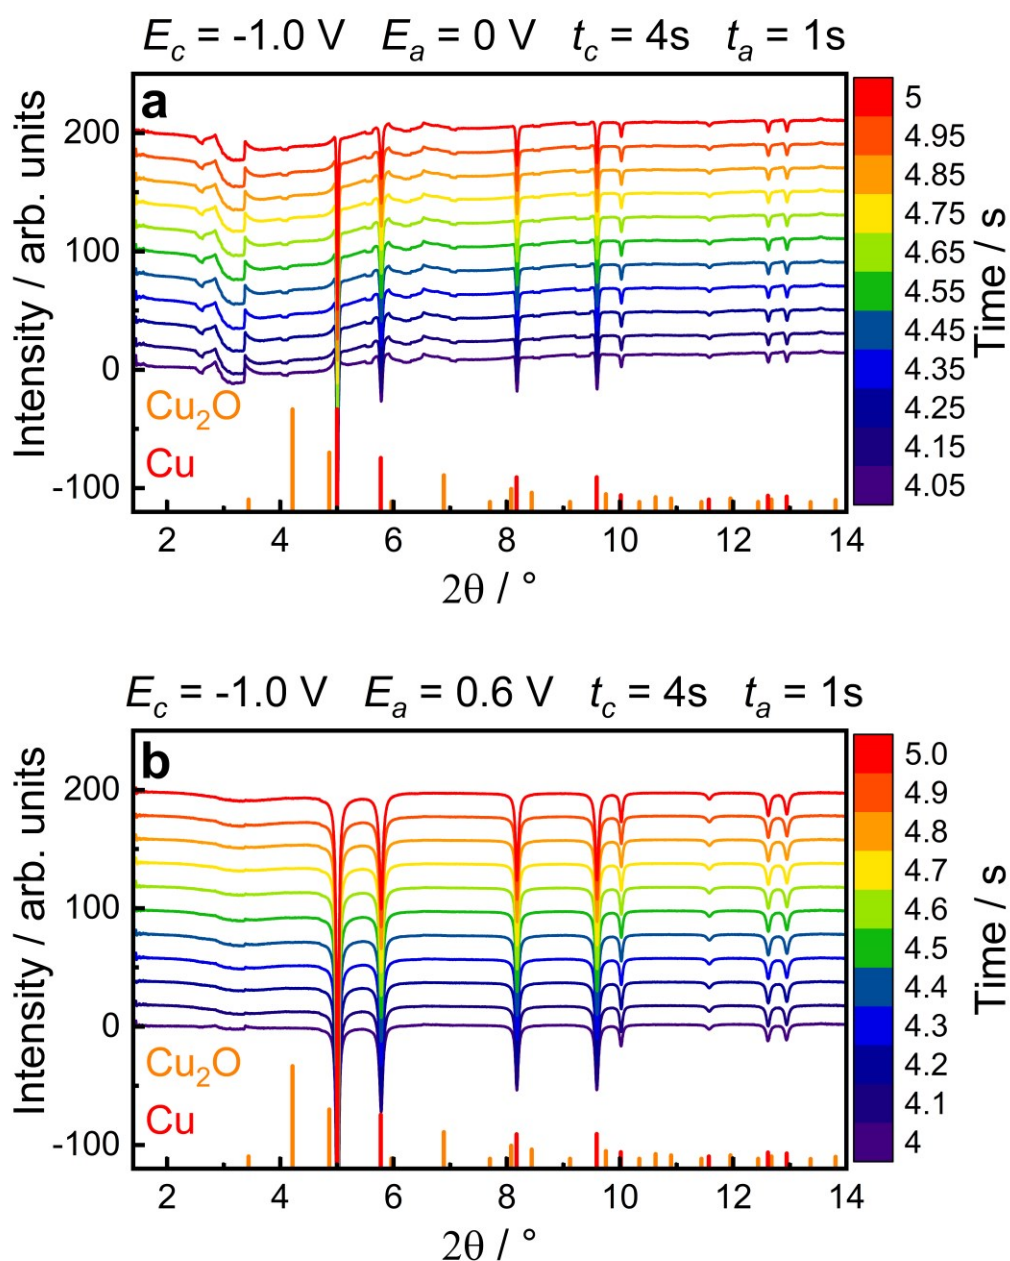

**Figure S39.** Evolution of the differential HE-XRD patterns of the pre-reduced Cu-Zn catalyst during the anodic pulse with  $t_c = 4 \text{ s}$  and  $t_a = 1 \text{ s}$  at **a**,  $E_a = 0 \text{ V}$  and **b**,  $0.6 \text{ V}$  in  $\text{CO}_2$ -saturated  $0.1 \text{ M KHCO}_3$ . The averaged diffraction patterns during the anodic pulse ( $t = 10\text{-}20 \text{ s}$ ) are subtracted from the averaged time-dependent diffraction pattern collected under pulsed  $\text{CO}_2\text{RR}$  conditions.

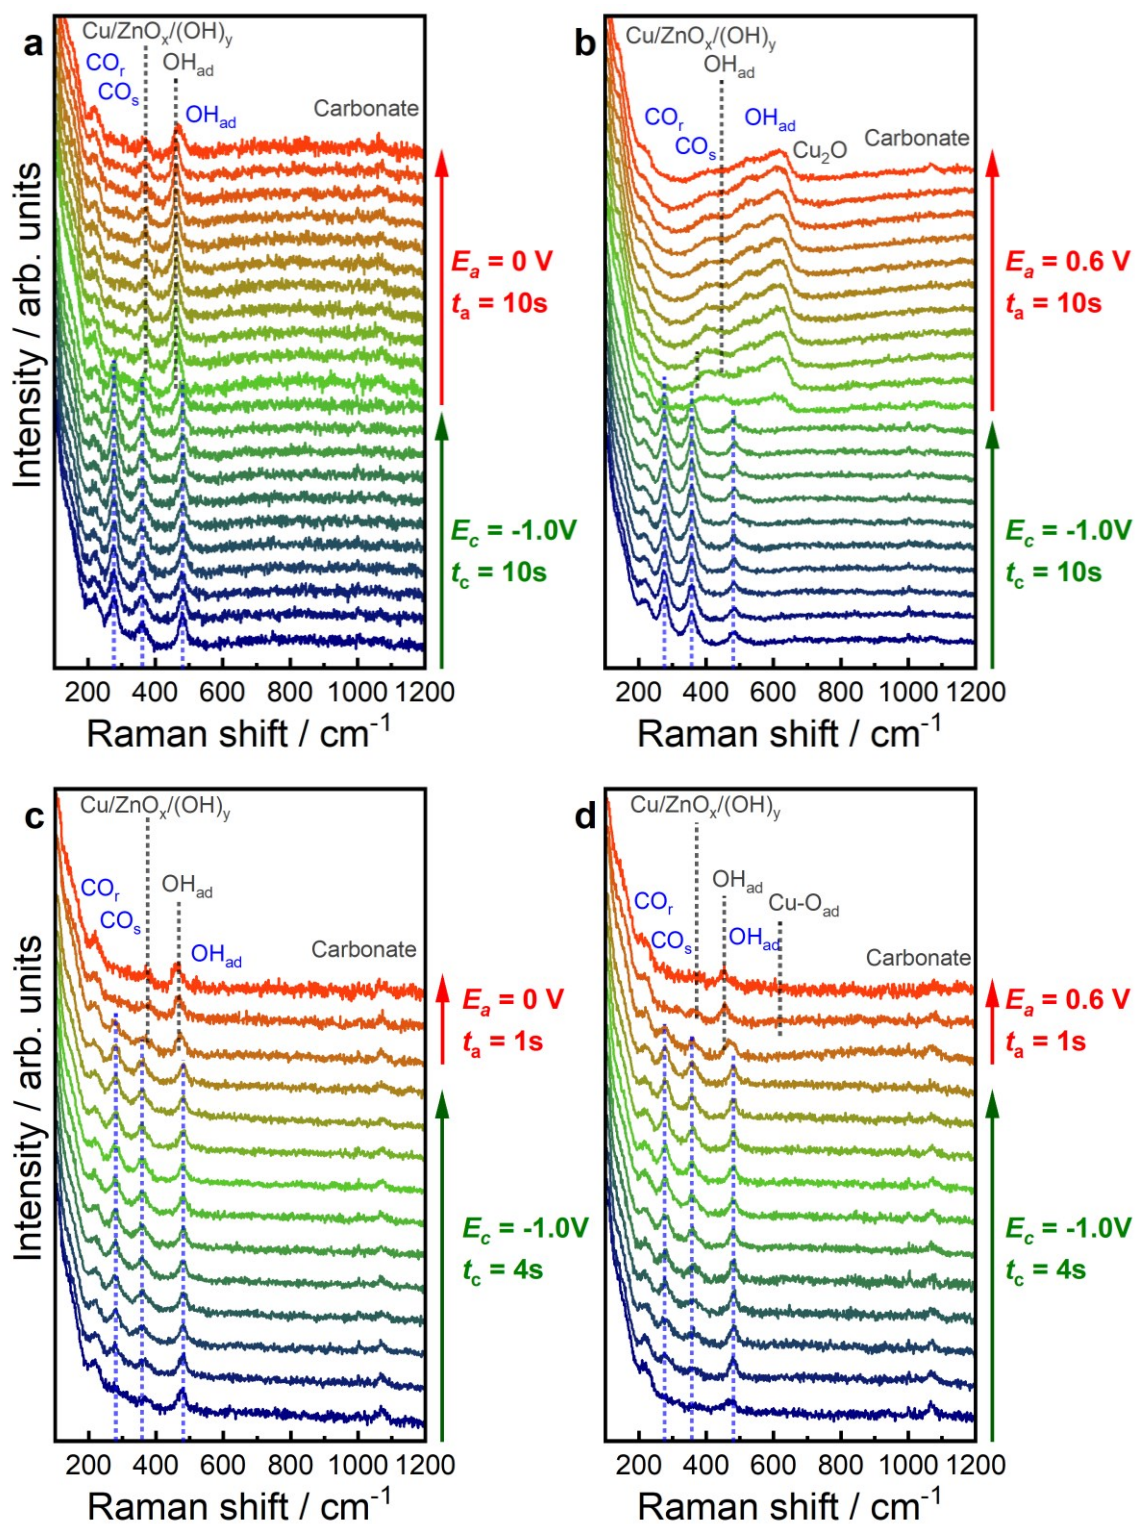

**Figure S40.** Evolution of the averaged SERS spectra of the pre-reduced Cu-Zn catalyst from 150-1200  $\text{cm}^{-1}$  during one pulse sequence with **a,b**,  $t_c = t_a = 10 \text{ s}$  and **c,d**,  $t_c = 4 \text{ s}$  and  $t_a = 1 \text{ s}$  with  $E_a = 0 \text{ V}$  and  $0.6 \text{ V}$  in  $\text{CO}_2$ -saturated  $0.1 \text{ M KHCO}_3$ . Characteristic bands are marked.



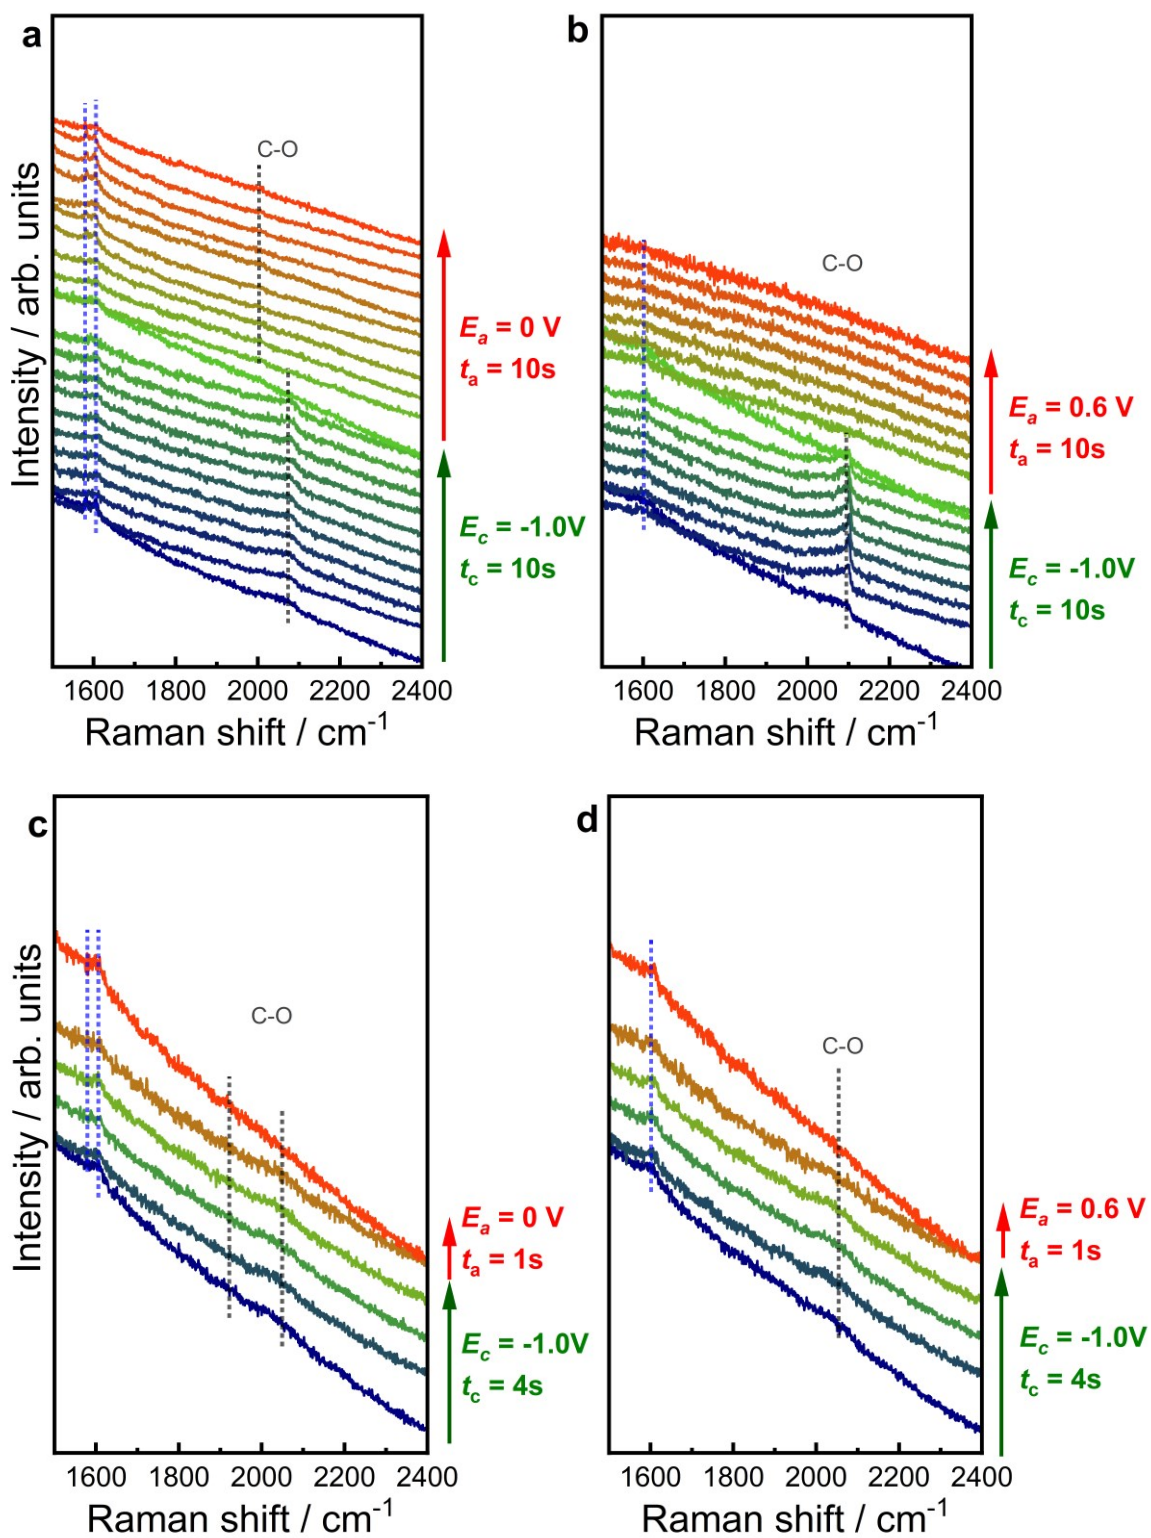

**Figure S41.** Evolution of the averaged SERS spectra of the pre-reduced Cu-Zn catalyst from 1500-2400  $\text{cm}^{-1}$  during one pulse sequence with **a,b**,  $t_c = t_a = 10$  s and **c,d**,  $t_c = 4$  s and  $t_a = 1$  s with  $E_a = 0$  V and 0.6 V in  $\text{CO}_2$ -saturated 0.1 M  $\text{KHCO}_3$ . Characteristic bands are marked.

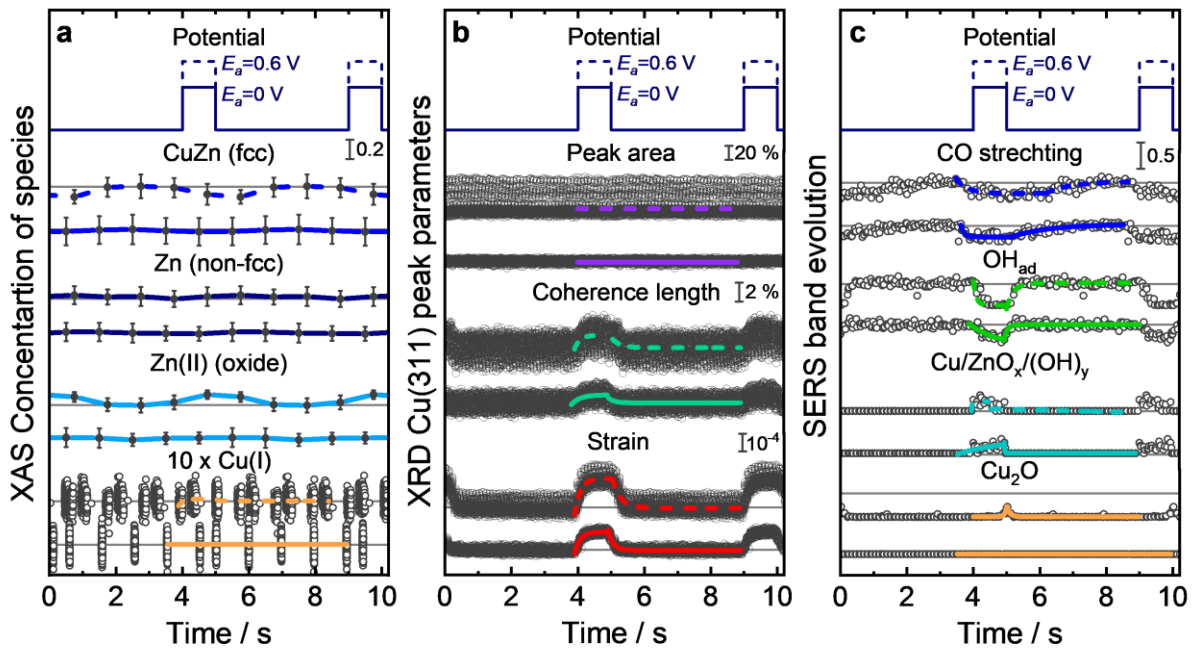

**Figure S42.** Averaged changes in the structure and adsorbates during a pulse sequence with  $E_c = -1.0$  V and  $E_a = 0$  V (bottom) or  $E_a = 0.6$  V (top) for  $t_c = 4$  s and  $t_a = 1$  s by operando measurements in  $\text{CO}_2$ -saturated 0.1 M  $\text{KHCO}_3$ . **a**, ML-EXAFS analysis results for the Zn K-edge show the concentrations of different Zn species, and LCA-XANES analysis results for Cu K-edge show variations in Cu(I) concentration. The concentration profile of Cu(I) is multiplied by 10 for better visibility. **b**, HE-XRD Cu(311) Bragg peak parameters such as the relative changes in the Bragg peak area, the Cu coherence length, and the lattice strain. **c**, Raman band evolution of adsorbed CO (stretching band at  $360\text{ cm}^{-1}$ ),  $\text{OH}_{\text{ad}}$  (adsorbed on Cu at  $490\text{ cm}^{-1}$ ),  $\text{Cu/ZnO}_x/(\text{OH})_y$  species ( $370\text{ cm}^{-1}$ ), and  $\text{Cu}_2\text{O}$  species (average of  $530$  and  $620\text{ cm}^{-1}$ ) obtained by fitting the intensities of the bands from the SERS spectra. The colored lines are exponential fits, and the solid lines represent the anodic pulse to 0 V, and the dashed lines the anodic pulse to 0.6 V. The solid grey lines indicate the respective values for each parameter at the end of the cathodic pulse.

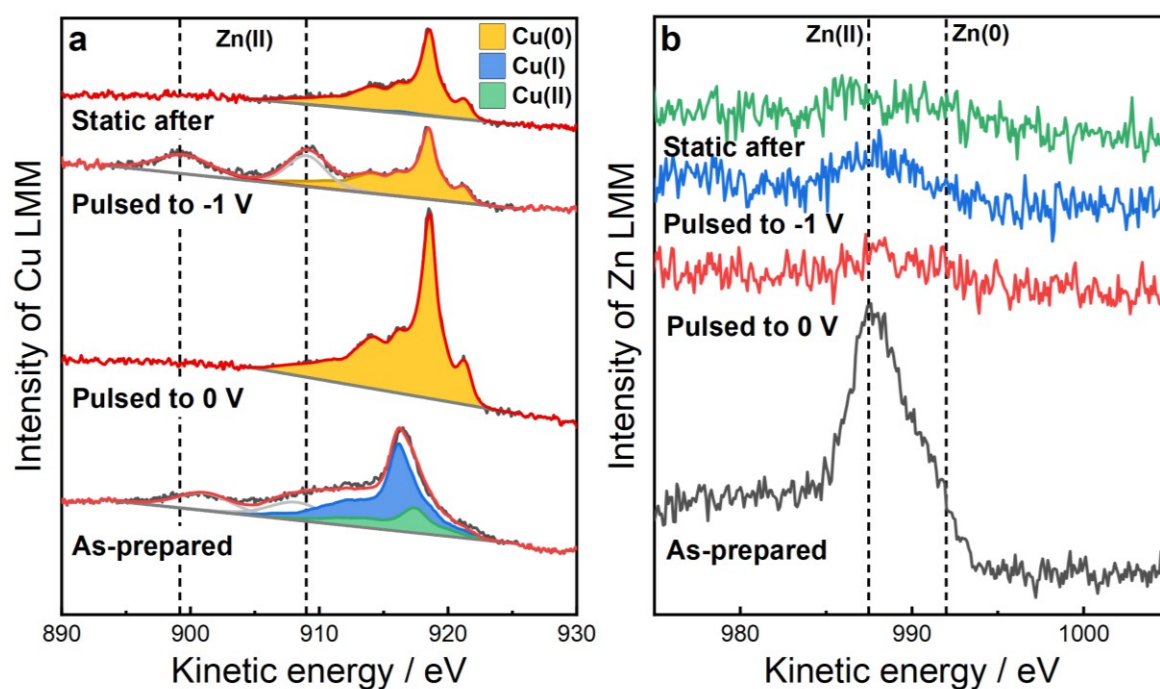

**Figure S43.** **a**, Quasi-in situ Cu LMM and **b**, Zn LMM Auger spectra of the Cu-Zn catalyst during different conditions in CO<sub>2</sub>-saturated 0.1 M KHCO<sub>3</sub>. Spectra for samples are compared where the pulse sequence ( $t_c = 4$  s and  $t_a = 1$  s,  $E_a = 0$  V) was interrupted at the cathodic or anodic pulse. Zn(II) peaks in Cu LMM correspond to the <sup>1</sup>P and <sup>3</sup>P final state of Zn LMM.

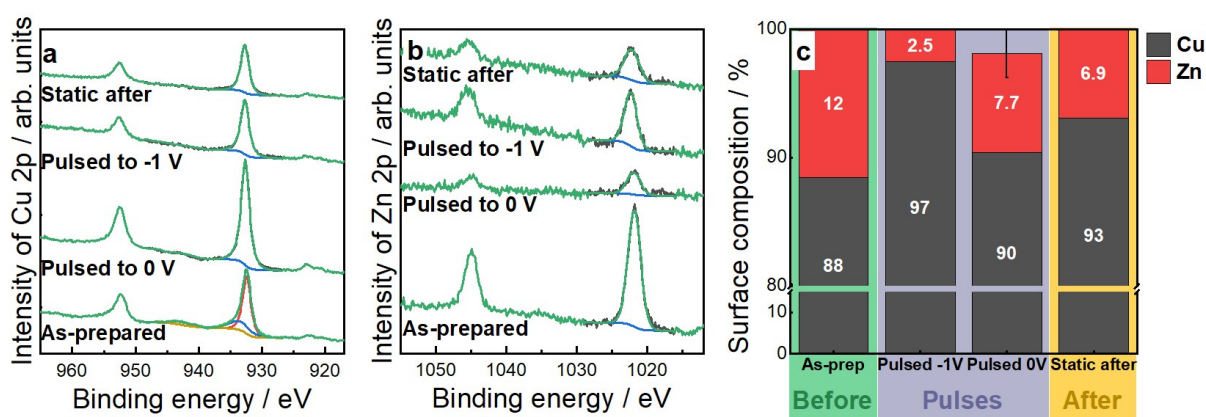

**Figure S44.** **a**, Quasi-in situ Cu 2p and **b**, Zn 2p core level regions of the Cu-Zn catalyst as well as **c**, the surface composition during different conditions. Spectra for samples are compared where the pulse sequence ( $t_c = 4$  s and  $t_a = 1$  s,  $E_a = 0$  V in CO<sub>2</sub>-saturated 0.1 M KHCO<sub>3</sub>) was interrupted at the cathodic or anodic pulse. We also note here that the increase in the Cu:Zn ratio might also be related to the dissolution of the unstable Zn(II) species. In fact, ICP-MS measurements of the electrolyte indicate an increasing dissolution of Zn with higher  $E_a$  values (Table S7). However, at  $E_a = 0$  V, the loss of Zn was only 10 %, and thus, surface segregation is likely to be the main reason for the detected change in surface composition.

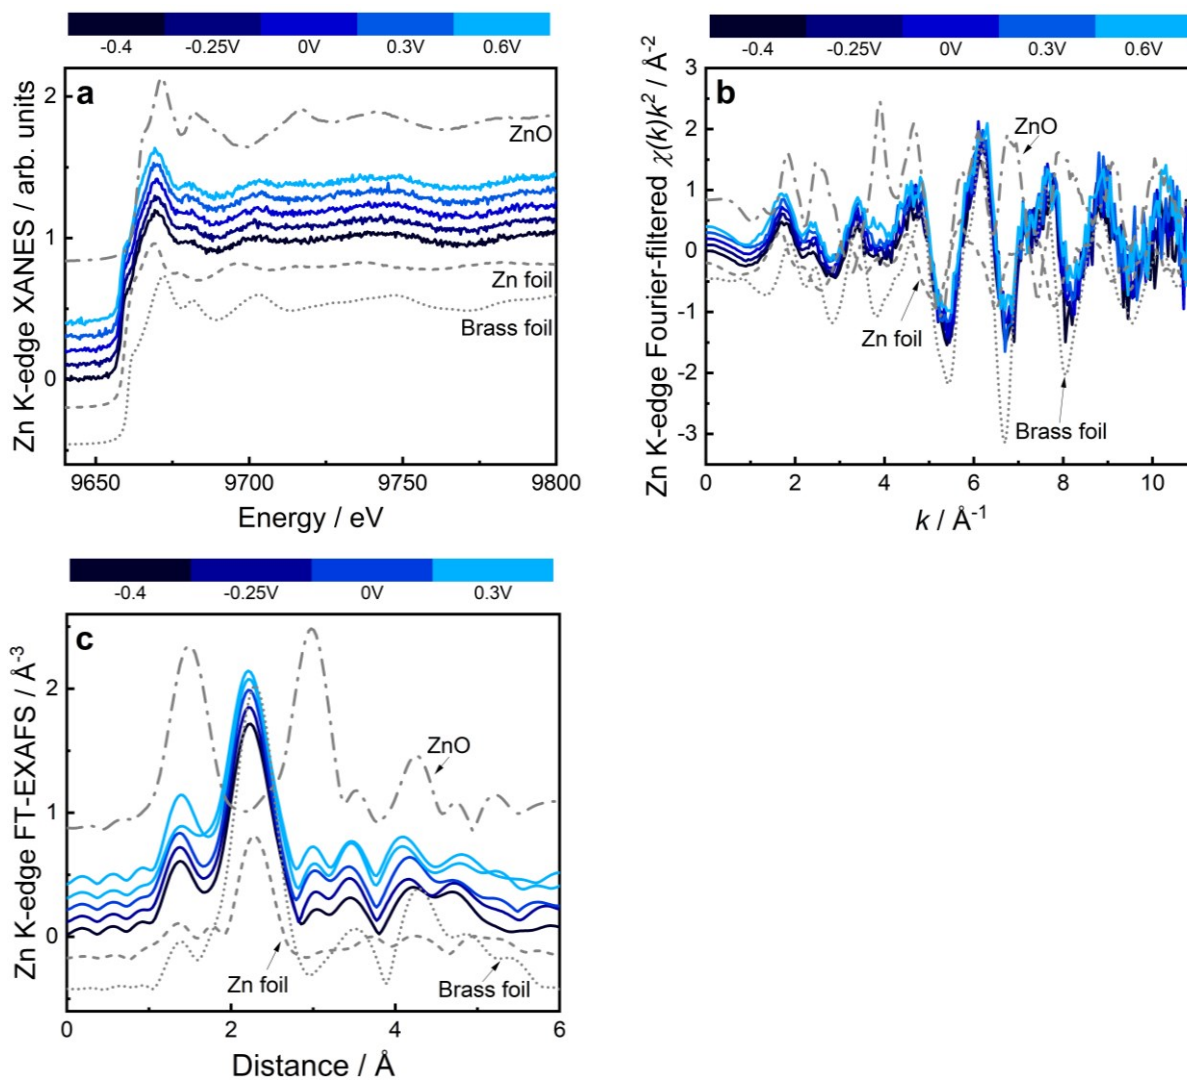

**Figure S45.** “Slow” (standard temporal resolution) operando Zn K-edge **a**, XANES, **b**, k-space, and **c**, EXAFS data during pulsed CO<sub>2</sub>RR with  $t_c = 4$  s and  $t_a = 1$  s at different  $E_a$  values, while  $E_c = -1.0$  V in CO<sub>2</sub>-saturated 0.1 M KHCO<sub>3</sub>. All data is shown with an offset in the y-axis.

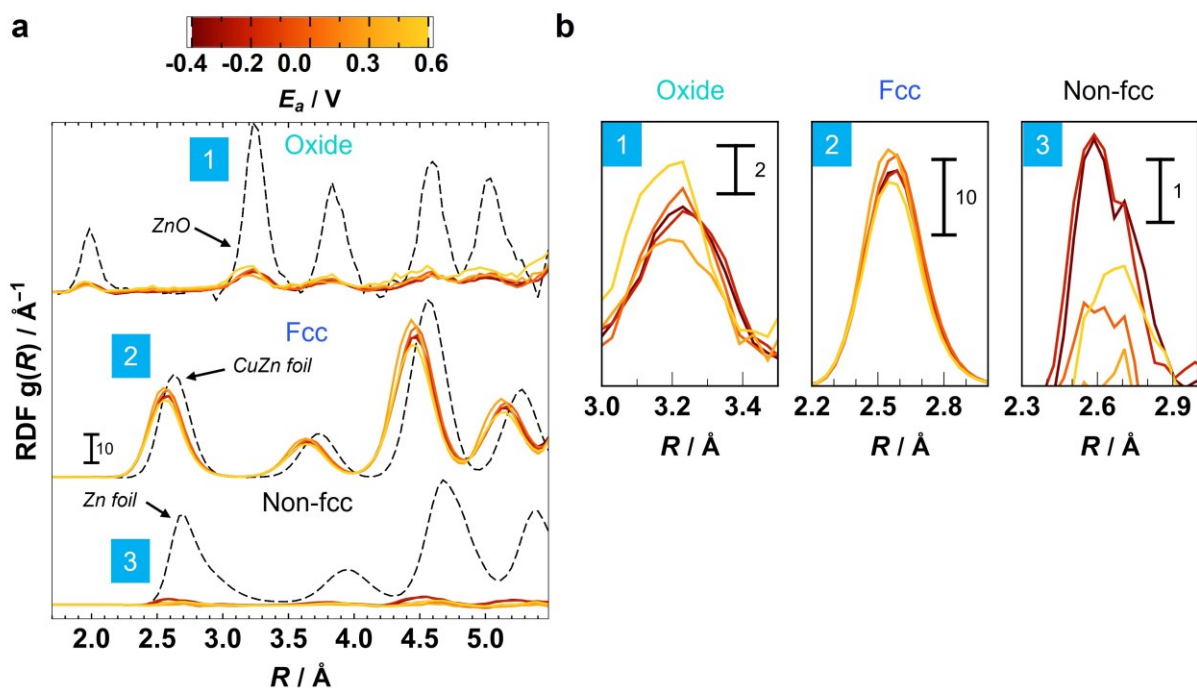

**Figure S46.** RDFs obtained by the NN-EXAFS analysis from operando Zn K-edge EXAFS data during pulsed  $\text{CO}_2\text{RR}$  with  $t_c = 4$  s and  $t_a = 1$  s at different  $E_a$  values, while  $E_c = -1.0$  V in  $\text{CO}_2$ -saturated 0.1 M  $\text{KHCO}_3$ . The partial RDFs correspond to an oxide phase, an fcc-type phase, and a non-fcc-type phase. **a**, RDFs are shifted vertically for clarity. **b**, shows excerpts of enlarged RDFs.

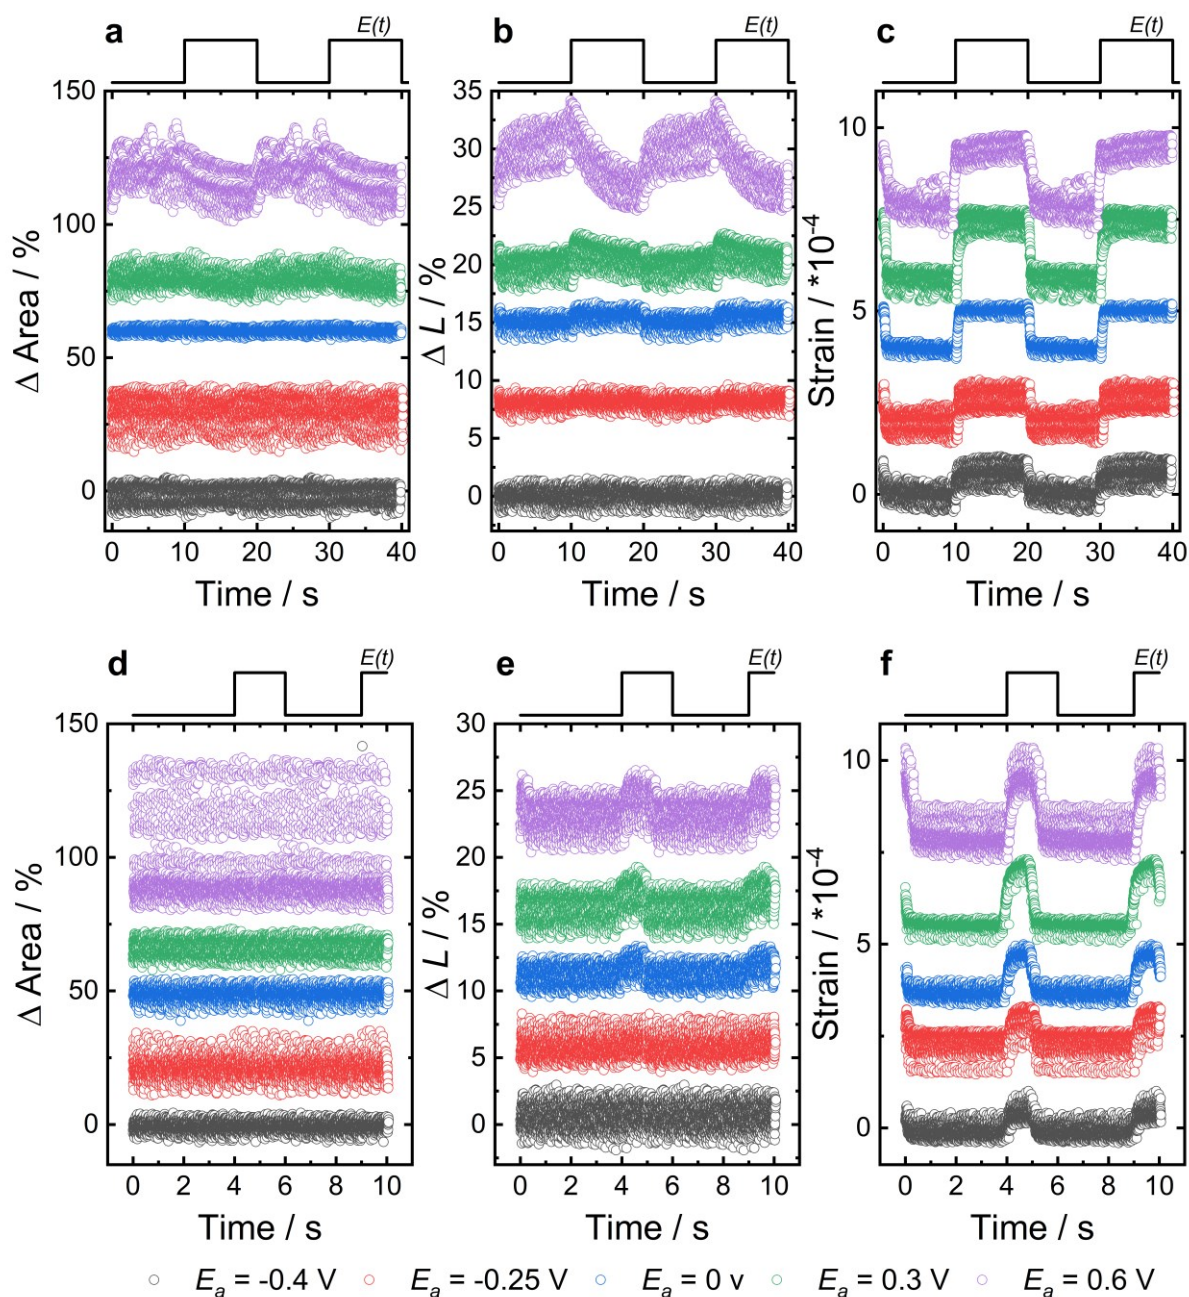

**Figure S47.** Averaged changes of the Cu(311) Bragg peak parameters during a pulse sequence with  $E_c = -1.0 \text{ V}$  and  $E_a = -0.4 \text{ V}$  (black),  $-0.25 \text{ V}$  (red),  $0 \text{ V}$  (blue),  $0.3 \text{ V}$  (green) and  $0.6 \text{ V}$  (purple) for different time lengths by operando HE-XRD in  $\text{CO}_2$ -saturated  $0.1 \text{ M KHCO}_3$ . **a**, Relative changes in the Bragg peak area, **b**, the Cu coherence length, and **c**, the lattice strain for  $t_c = t_a = 10 \text{ s}$ . **d**, Relative changes in the Bragg peak area, **e**, the Cu coherence length, and **f**, the lattice strain for  $t_c = 4 \text{ s}$  and  $t_a = 1 \text{ s}$ .

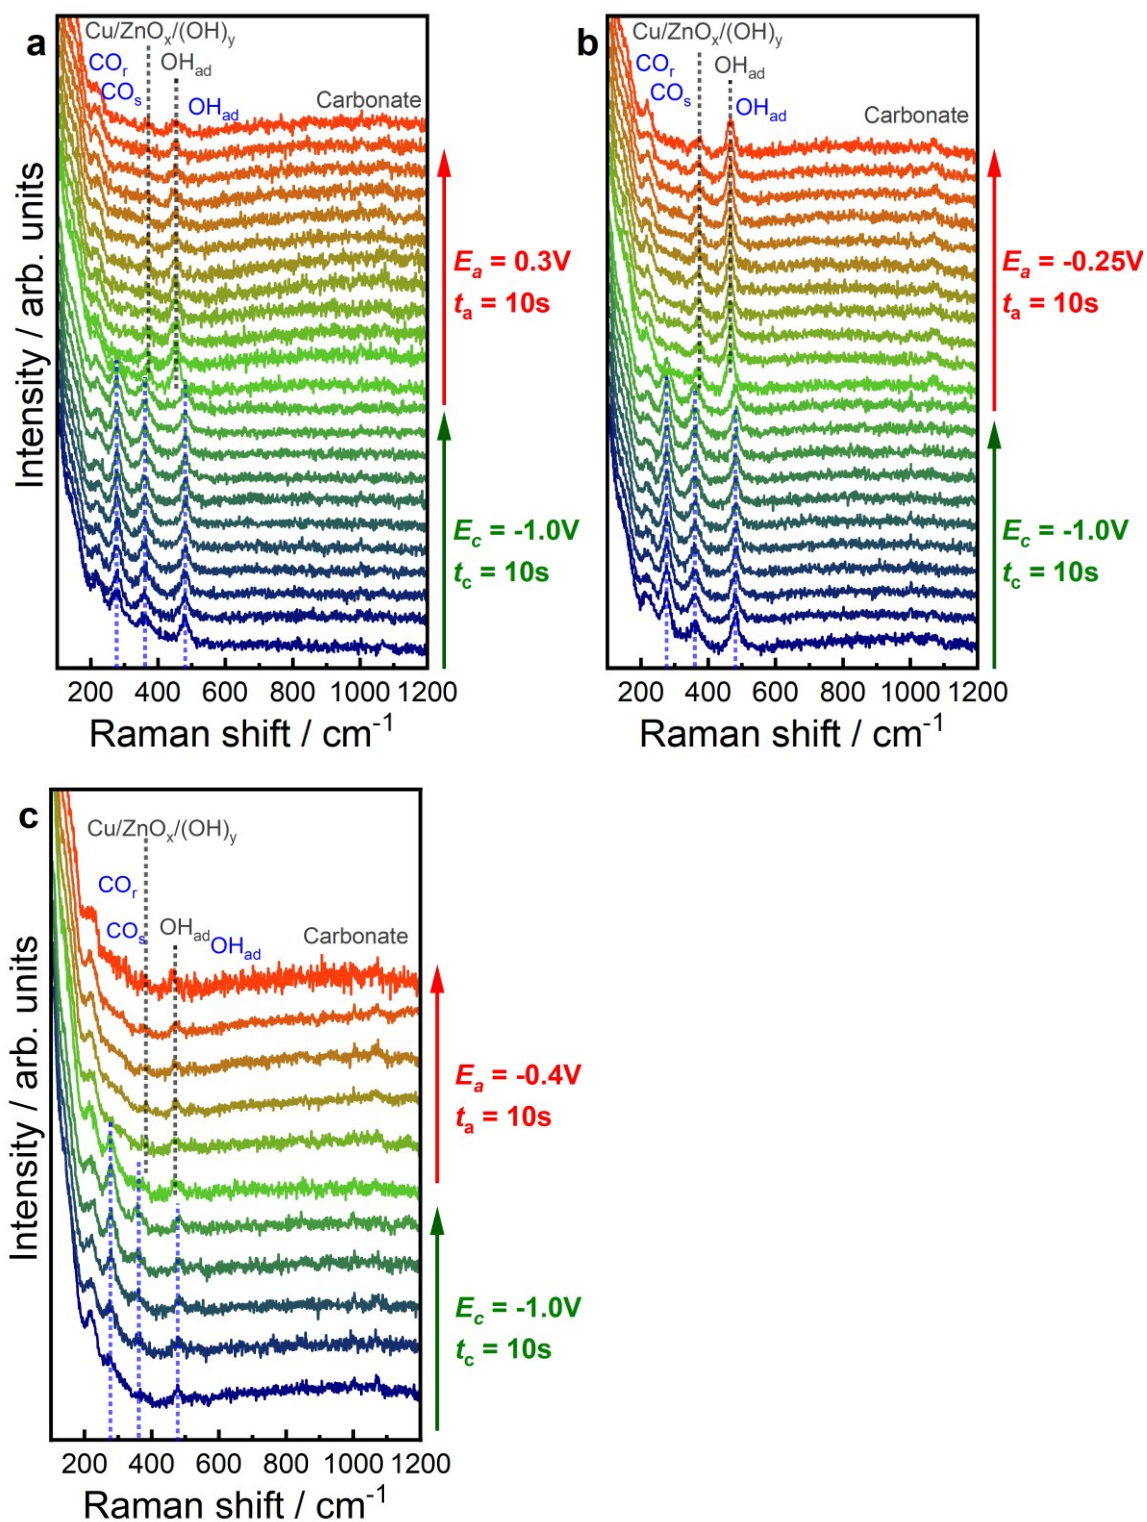

**Figure S48.** Evolution of the averaged SERS spectra of the pre-reduced Cu-Zn catalyst from 150-1200  $\text{cm}^{-1}$  during one pulse sequence with  $t_c = t_a = 10$  s at **a**,  $E_a = +0.3$  V, at **b**,  $E_a = -0.25$  V and at **c**,  $E_a = -0.4$  V in  $\text{CO}_2$ -saturated 0.1 M  $\text{KHCO}_3$ . Characteristic bands are marked.

## Supplementary Tables

**Table S1.** Edge lengths and corresponding size distribution of Cu-Zn obtained from the analysis of STEM images in the as-prepared state, after 1 h of static CO<sub>2</sub>RR, and after different pulse protocols with fixed  $E_c = -1.0$  V,  $t_c = 4$  s and  $t_a = 1$  s in CO<sub>2</sub>-saturated 0.1 M KHCO<sub>3</sub>.

| Sample                    | Edge length / Particle diameter of Cu [nm] | Length of Zn [nm]  |
|---------------------------|--------------------------------------------|--------------------|
| As-prepared               | 20(3)                                      | 2.0(5) (Edges)     |
| Static at -1.0 V          | 24(4)                                      | 4.0(6) (Particles) |
| Pulsed with $E_a = 0$ V   | 24(5)                                      | 5(1) (Particles)   |
| Pulsed with $E_a = 0.6$ V | 28(5)                                      | 21(8) (Islands)    |

**Table S2.** Elemental quantification of Cu and Zn extracted from the STEM-EDX images of **Fig. 1** of Cu-Zn in the as-prepared state, after 1 h of static CO<sub>2</sub>RR and after different pulse protocols with fixed  $E_c = -1.0$  V,  $t_c = 4$  s and  $t_a = 1$  s, while  $E_a$  was varied in CO<sub>2</sub>-saturated 0.1 M KHCO<sub>3</sub>.

| Sample                    | Cu [%]  | Zn [%] |
|---------------------------|---------|--------|
| As-prepared               | 93.6(8) | 6.4(8) |
| Static at -1.0 V          | 95.8(6) | 4.2(6) |
| Pulsed with $E_a = 0$ V   | 97.1(4) | 3.0(4) |
| Pulsed with $E_a = 0.6$ V | 96.1(5) | 3.9(5) |

**Table S3.** Cu and Zn composition of as-prepared Zn/Cu<sub>2</sub>O NCs (powder) obtained by ICP-MS.

| Sample      | Cu [at%] | Zn [at%] |
|-------------|----------|----------|
| As-prepared | 93.5(7)  | 6.5(7)   |



**Table S4.** Edge lengths and corresponding size distribution of Cu-Zn obtained from the analysis of SEM images in as-prepared state, after 1 h of static CO<sub>2</sub>RR and after different pulse protocols (different  $E_a$ ), but with fixed  $E_c = -1.0$  V,  $t_c = 4$  s and  $t_a = 1$  s in CO<sub>2</sub>-saturated 0.1 M KHCO<sub>3</sub>.

| Sample                      | Edge length [nm] |
|-----------------------------|------------------|
| As-prepared                 | 23(4)            |
| Static at -1.0 V            | 26(6)            |
| Pulsed with $E_a = -0.4$ V  | 27(5)            |
| Pulsed with $E_a = -0.25$ V | 26(6)            |
| Pulsed with $E_a = 0$ V     | 27(6)            |
| Pulsed with $E_a = 0.3$ V   | 33(8)            |
| Pulsed with $E_a = 0.6$ V   | 35(6)            |

**Table S5.** Edge lengths and corresponding size distribution of the bare Cu<sub>2</sub>O cubes obtained from the analysis of STEM images in as-prepared state, after 1 h of static CO<sub>2</sub>RR and after 1 h of pulsed CO<sub>2</sub>RR at  $E_a = 0$  V ( $E_c = -1.0$  V,  $t_c = 4$  s and  $t_a = 1$  s).

| Sample                  | Edge length of Cu [nm] |
|-------------------------|------------------------|
| As-prepared             | 24(4)                  |
| Static at -1.0 V        | 27(6)                  |
| Pulsed with $E_a = 0$ V | 35(6)                  |

**Table S6.** Composition of Cu and Zn in the as-prepared state and after 1 h of static CO<sub>2</sub>RR of the Cu-Zn catalyst obtained by the comparison of the 2p quasi-in situ XPS spectra (shown in Fig. S15).

| Sample              | Cu 2p [at%] | Zn 2p [at%] |
|---------------------|-------------|-------------|
| As-prepared         | 85(2)       | 15(1)       |
| Static after -1.0 V | 90(1)       | 10(1)       |

**Table S7.** Cu and Zn mass and composition of Cu-Zn catalyst in the electrolyte by ICP-MS measurements after 1 h of different reaction conditions.

| Sample            | $m_{Cu}$ [ $\mu\text{g}$ ] | Cu [at%]  | $m_{Zn}$ [ $\mu\text{g}$ ] | Zn [at%] |
|-------------------|----------------------------|-----------|----------------------------|----------|
| Static at -1.0 V  | 0.62(8)                    | 0.44(5)   | 0.13(2)                    | 1.4(3)   |
| Pulsed to -0.4 V  | 0.355(2)                   | 0.253(2)  | 0.51(1)                    | 5.5(5)   |
| Pulsed to -0.25 V | 0.683(3)                   | 0.488(3)  | 1.044(1)                   | 1.044(1) |
| Pulsed to 0 V     | 0.3158(9)                  | 0.2256(7) | 0.994(6)                   | 10.75(7) |
| Pulsed to 0.3 V   | 0.997(4)                   | 0.712(3)  | 2.239(5)                   | 24.20(5) |
| Pulsed to 0.6 V   | 1.457(1)                   | 1.0407(9) | 1.914(6)                   | 20.70(6) |

### Supplementary References

(1) Timoshenko, J.; Bergmann, A.; Rettenmaier, C.; Herzog, A.; Arán-Ais, R. M.; Jeon, H. S.; Haase, F. T.; Hejral, U.; Grosse, P.; Kühn, S.; Davis, E. M.; Tian, J.; Magnussen, O.; Roldan Cuenya, B., Steering the structure and selectivity of CO<sub>2</sub> electroreduction catalysts by potential pulses. *Nat. Catal.* **2022**, *5*, 259-267.

(2) Rüscher, M.; Herzog, A.; Timoshenko, J.; Jeon, H. S.; Frandsen, W.; Kühn, S.; Roldan Cuenya, B., Tracking heterogeneous structural motifs and the redox behaviour of copper–zinc nanocatalysts for the electrocatalytic CO<sub>2</sub> reduction using operando time resolved spectroscopy and machine learning. *Catal. Sci. Technol.* **2022**, *12*, 3028-3043.

(3) Schmitt, K. G.; Gewirth, A. A., In Situ Surface-Enhanced Raman Spectroscopy of the Electrochemical Reduction of Carbon Dioxide on Silver with 3,5-Diamino-1,2,4-Triazole. *J. Phys. Chem. C* **2014**, *118*, 17567-17576.

(4) Kottakkat, T.; Klingan, K.; Jiang, S.; Jovanov, Z. P.; Davies, V. H.; El-Nagar, G. A. M.; Dau, H.; Roth, C., Electrodeposited AgCu Foam Catalysts for Enhanced Reduction of CO<sub>2</sub> to CO. *ACS Appl. Mater. Interfaces* **2019**, *11*, 14734-14744.
